# Supplementary material for: Microarray analysis of ox-LDL (oxidized low-density lipoprotein)-regulated genes in human coronary artery smooth muscle cells
Source: PubMed Central journal article supplement — Cell Biol Int Rep (2010). 2010 Dec 16;17(2):e00007. doi: 10.1042/CBR20100006 (PMC3475437; doi:10.1042/cbr20100006), 2010-12-16
Supplement: cbr017e007add.pdf [file cbr017e007add.pdf]

# Microarray analysis of ox-LDL (oxidized low-density lipoprotein)-regulated genes in human coronary artery smooth muscle cells

Joe Minta<sup>1\*</sup>, James Jungwon Yun<sup>\*†</sup> and Rosanne St. Bernard\*

\* Department of Laboratory Medicine and Pathobiology, Faculty of Medicine, University of Toronto, Toronto M5S 1A8, Canada

† Applied Molecular Oncology, Ontario Cancer Institute/University Health Network, Toronto, Ontario M5G 2M9, Canada

**Cite this article as:** Minta J, Yun JJ and St-Bernard R (2010) Microarray analysis of ox-LDL (oxidized low-density lipoprotein)-regulated genes in human coronary artery smooth muscle cells. *Cell Biol. Int. Rep.* 17(2):art:e00007.doi:10.1042/CBR20100006

Keywords: microarray; oxidized low-density lipoprotein; quantitative PCR; transcriptome; vascular smooth muscle cell

**Table S1** Functional categories

| Accession number                              | Gene title                                             | 3 h  | 21 h | Function                                  |
|-----------------------------------------------|--------------------------------------------------------|------|------|-------------------------------------------|
| <b>Apoptosis</b>                              |                                                        |      |      |                                           |
| AF095192                                      | BAG-family regulator-2; BCL2-associated athanogene 2   | 1.9  | NC   | Protein folding; apoptosis                |
| NM_001348                                     | Death-associated protein kinase 3                      | 1.8  | NC   | Induction of apoptosis                    |
| U83981                                        | Apoptosis-associated protein (GADD34)                  | 1.8  | 1.8  | Cell cycle arrest                         |
| AF083421                                      | Immediate early response 3 (IER3)                      | -2.1 | NC   | Apoptosis inhibitor activity              |
| NM_005178                                     | B-cell CLL/lymphoma 3 (BCL3)                           | -2.4 | NC   | Cell cycle regulation                     |
| AF069073                                      | p8 protein homologue (COM1)                            | NC   | 2.9  | Induction of apoptosis                    |
| NM_002342                                     | Lymphotoxin beta receptor (LTBR) (TNFRSF3)             | NC   | 2.8  | TNFR-related protein                      |
| NM_005380                                     | Neuroblastoma, suppression of tumourigenicity 1 (NBL1) | NC   | 2.2  | Negative regulation of cell cycle         |
| NM_006765                                     | N33; Putative prostate cancer tumour suppressor        | NC   | -1.9 | Tumour suppressor                         |
| NM_022121                                     | p53-induced protein (PIGPC1)                           | NC   | -2   |                                           |
| Z70519                                        | FASAp0 1 protein (TNFRSF6)                             | NC   | -2.2 | Induction of apoptosis                    |
| NM_014452                                     | Death receptor 6                                       | NC   | -2.4 | Induction of apoptosis                    |
| NM_002583                                     | PRKC, apoptosis WT1 regulator (PAWR)                   | NC   | -2.6 | Negative regulation of proliferation      |
| NM_003842                                     | TNFR superfamily, member 10b (TNFRSF10B)               | NC   | -3.4 | Induction of apoptosis                    |
| NM_013437                                     | Potential tumour suppressor (ST7)                      | NC   | -3.6 | Tumour suppressor                         |
| NM_021960                                     | Myeloid cell leukaemia sequence 1 (BCL2-related)       | NC   | -6   | Apoptotic program                         |
| <b>Cell adhesion and cell-cell signalling</b> |                                                        |      |      |                                           |
| NM_001200                                     | Bone morphogenetic protein 2 (BMP2)                    | 6.7  | NC   | Skeletal development                      |
| NM_013372                                     | Cysteine knot superfamily 1 (CKTSF1B1)                 | 2.8  | NC   | Block BMP signalling                      |
| AF154054                                      | DRM; cysteine knot superfamily 1                       | 2.4  | NC   | Antagonist of bone morphogenetic protein  |
| U73936                                        | Jagged 1 (HJ1)                                         | 1.9  | NC   | Cell communication                        |
| NM_016157                                     | Trophinin (TRO)                                        | -3.7 | NC   | Embryo implantation                       |
| NM_016223                                     | PKC and casein kinase substrate in neurons 3 (PACSIN3) | NC   | 7.3  | Kinesin complex; focal adhesion           |
| NM_004952                                     | Ephrin-A3                                              | NC   | 7    | Cell-cell signalling                      |
| AI692180                                      | Liprin beta 2                                          | NC   | 6.3  | Cell adhesion                             |
| NM_002587                                     | Protocadherin 1 (cadherin-like 1) (PCDH1)              | NC   | 3.9  | Calcium-dependent cell-cell adhesion      |
| NM_002204                                     | Integrin, alpha 3; CD49C (ITGA3)                       | NC   | 2.2  | Cell matrix adhesion                      |
| NM_002087                                     | Granulin (grn)                                         | NC   | 2.1  | Cell-cell signalling; signal transduction |
| BC004542                                      | Plexin b2                                              | NC   | 2.1  | Cell adhesion molecule                    |
| NM_013231                                     | Fibronectin leucine-rich transmembrane protein 2       | NC   | 2    | Cell adhesion                             |
| NM_001627                                     | Activated leucocyte cell adhesion molecule (ALCAM)     | NC   | 1.8  | Cell adhesion molecule                    |
| NM_000201                                     | Intercellular adhesion molecule 1 (CD54) (ICAM1)       | NC   | 1.8  | Ligand for LFA antigens                   |
| NM_004357                                     | CD151 antigen (CD151)                                  | NC   | 1.7  | Cell adhesion                             |

<sup>1</sup> To whom correspondence should be addressed (email joe.minta@utoronto.ca).

**Abbreviations used:** hr, human recombinant; LDL, low-density lipoproteins; MDA, malondialdehyde; n-LDL, non-oxidized LDL; ox-LDL, oxidized low-density lipoproteins; SmBM, SMC basal medium; SMCs, smooth muscle cells; TBARS, thiobarbituric acid-reactive substance.

Table S1 Continued.

| Accession number                      | Gene title                                           | 3 h  | 21 h | Function                                                   |
|---------------------------------------|------------------------------------------------------|------|------|------------------------------------------------------------|
| AL037557                              | Laminin receptor 1                                   | NC   | 1.6  | Receptor for basement membrane laminin                     |
| AB002382                              | Catenin (cadherin-associated protein), delta         | NC   | -1.6 | Cell-cell adhesion                                         |
| NM_001792                             | Cadherin 2, type 1 (CDH2)                            | NC   | -2.1 | Cell adhesion                                              |
| NM_001078                             | Vascular cell adhesion molecule 1 (VCAM1)            | NC   | -2.1 | Adhesion of monocytes and lymphocytes                      |
| NM_000885                             | Alpha 4 subunit of VLA-4 receptor CD49D (ITGA4)      | NC   | -2.6 | Cell-matrix adhesion; integrin-mediated signalling pathway |
| AF152501                              | Protocadherin beta 8 (PCDHB8)                        | NC   | -2.6 | Homophilic cell adhesion; cell adhesion                    |
| NM_005506                             | CD36                                                 | NC   | -2.8 | Cell adhesion                                              |
| AF263279                              | Sialomucin CD164                                     | NC   | -3.3 | Regulation of haematopoiesis; cell adhesion                |
| AU135154                              | A disintegrin and metalloproteinase domain 10        | NC   | -3.4 | Cell-cell signalling                                       |
| <b>Cell motility and cytoskeleton</b> |                                                      |      |      |                                                            |
| NM_004817                             | Tight junction protein 2 (zona occludens 2) (TJP2)   | 6.7  | NC   | Links junctional membrane proteins to actin                |
| NM_012134                             | Leiomodin 1 (LMOD1)                                  | 3.1  | NC   | Tropomyosin binding                                        |
| AI688418                              | Plexin A2 (PLXNA2)                                   | 1.6  | NC   | Signal transduction; cell proportion                       |
| AF043337                              | Interleukin 8 C-terminal variant (IL8)               | -1.8 | -8.1 | Cell motility; intracellular signalling cascade            |
| D49372                                | Eotaxin                                              | -2.2 | -2.5 | Chemokine; signal transduction                             |
| U88321                                | Beta chemokine Exodus-3                              | -3   | -4.1 | Chemotaxis; cell communication                             |
| NM_004999                             | Myosin VI                                            | NC   | 6.1  | Myosin ATPase activity; motor activity                     |
| NM_006709                             | HLA-B-associated transcript 8 (BATS8)                | NC   | 5    | Histone-lysine <i>N</i> -methyltransferase activity        |
| M13452                                | Lamin A                                              | NC   | 4.8  | Interacts with intermediate filaments                      |
| BG475299                              | ems1 (cortactin) p8085 src substrate                 | NC   | 3.1  | Actin-binding protein                                      |
| NM_020987                             | Ankyrin 3 (ANK3)                                     | NC   | 2.7  | Cytoskeletal anchoring                                     |
| NM_004395                             | Drebrin 1 (DBN1)                                     | NC   | 2.4  | Actin binding                                              |
| NM_006848                             | Hepatitis delta antigen-interacting protein A (DIPA) | NC   | 2.4  | Kinesin complex                                            |
| M86406                                | Skeletal muscle alpha 2 actinin (ACTN2)              | NC   | 2.4  | Anchor myofibrillar actin filaments                        |
| NM_002373                             | Microtubule-associated protein                       | NC   | 2.1  | Modulate the assembly of microtubules                      |
| BC005338                              | Capping protein muscle Z-line, alpha 2               | NC   | -1.4 | Actin binding                                              |
| NM_004342                             | Caldesmon 1                                          | NC   | -1.5 | Tropomyosin and actin binding                              |
| BC005838                              | Tubulin, beta 5                                      | NC   | -1.6 | Microtubule-based movement                                 |
| NM_005721                             | Actin-related protein 3, yeast homologue (ACTR3)     | NC   | -1.7 | Cell motility                                              |
| X00351                                | Beta-actin                                           | NC   | -1.7 | Cell motility                                              |
| AF141349                              | Beta-tubulin                                         | NC   | -1.8 | Cell motility                                              |
| NM_006870                             | Destrin (actin-depolymerizing factor)                | NC   | -1.9 | Actin polymerization and/or depolymerization               |
| NM_002480                             | Myosin phosphatase, target subunit 1 (MYPT1)         | NC   | -2.1 | Regulation of muscle contraction                           |
| NM_000366                             | Tropomyosin 1 (alpha) (TPM1)                         | NC   | -2.5 | Regulation of muscle contraction                           |
| AI214061                              | Tropomyosin 4                                        | NC   | -2.9 | Constituent of muscle                                      |
| NM_005722                             | Actin-related protein 2, yeast homologue (ACTR2)     | NC   | -3   | Cell motility                                              |
| BE675337                              | Gelsolin                                             | NC   | -6.4 | Actin filament polymerization                              |
| BC001352                              | Tubulin, beta polypeptide                            | NC   | -6.5 | Microtubule-based movement                                 |
| AJ276395                              | Migration stimulation factor FN70                    | NC   | -8.4 | Cell motility                                              |
| <b>Cell proliferation</b>             |                                                      |      |      |                                                            |
| U66838                                | Cyclin A1 (CCNA1)                                    | 7.6  | NC   | Regulates cell cycle CDK2 and CDC2                         |
| AA166684                              | Cell division cycle 27 (CDC27)                       | 5.4  | 8.2  | Mitotic metaphase/anaphase transition                      |
| NM_021120                             | Discs, large homolog 3 (DLG3)                        | 4.6  | NC   | Negative regulation of cell proliferation                  |
| AI770084                              | Dihydropyrimidinase-like 2                           | 3.8  | NC   | Regulates axonal growth and branching                      |
| AW189518                              | Piwi ( <i>Drosophila</i> )-like 1                    | 3.2  | NC   | Oogenesis; spermatogenesis                                 |
| D84212                                | Serine/threonine kinase 6 (STK6)                     | 2.9  | NC   | Cell growth                                                |
| NM_001423                             | Epithelial membrane protein 1 (EMP1)                 | 2.3  | NC   | Cell proliferation; epidermal differentiation              |
| AF188298                              | Disabled 2 p93 (DAB2)                                | 2.2  | NC   | Cell proliferation; tumour suppressor                      |
| BF514079                              | Gut-enriched Kruppel-like factor (Gklf)              | 2.1  | NC   | Inhibition of DNA synthesis                                |
| NM_002510                             | Glycoprotein transmembrane nmb (GPNMB)               | 2    | 4.9  | Negative regulation of cell proliferation                  |

Table S1 Continued.

| Accession number                       | Gene title                                                         | 3 h  | 21 h | Function                                                       |
|----------------------------------------|--------------------------------------------------------------------|------|------|----------------------------------------------------------------|
| NM_002048                              | Growth arrest-specific 1 (GAS1)                                    | −3.3 | NC   | Cell cycle arrest                                              |
| D64109                                 | Tob family; transducer of ERBB2                                    | NC   | 10.5 | Negative regulation of cell proliferation                      |
| NM_003308                              | Testis-specific protein, Y-linked (TSPY)                           | NC   | 5.5  | Spermatogenesis                                                |
| NM_016195                              | M-phase phosphoprotein 1 (MPHOSPH1)                                | NC   | 3.4  | Microtubule disassembly at G2 to M phase                       |
| NM_000820                              | Growth arrest-specific 6 (GAS6), mRNA                              | NC   | 2.7  | Negative regulation of cell proliferation                      |
| M73554                                 | Bcl-1; cyclin D1 (PRAD1)                                           | NC   | 2.5  | G1/S transition of mitosis                                     |
| L13720                                 | Growth-arrest-specific protein (gas)                               | NC   | 2.5  | Negative regulation of cell proliferation                      |
| NM_021873                              | Cell division cycle 25B (CDC25B)                                   | NC   | 2.3  | Positive regulation of cell cycle                              |
| BC000076                               | Cyclin D1 (PRAD1)                                                  | NC   | 2.3  | Activates cdc2 (p34)                                           |
| NM_004864                              | Prostate differentiation factor                                    | NC   | 2.2  |                                                                |
| AK023348                               | Clone 24720 epithelin 1 and 2; granulin                            | NC   | 2    | Growth modulatory activity                                     |
| NM_015392                              | Neural proliferation differentiation and control 1 (NPDC1)         | NC   | 2    |                                                                |
| NM_001425                              | Epithelial membrane protein 3 (EMP3)                               | NC   | 1.9  | Negative regulation of cell proliferation                      |
| L49506                                 | Cyclin G2                                                          | NC   | −2   | Regulates specific cell cycle CDKs                             |
| AV700514                               | Ceroid-lipofuscinosis, neuronal 5                                  | NC   | −2.4 | Cell growth and/or maintenance                                 |
| NM_012325                              | Microtubule-associated protein, RPEB family, member 1              | NC   | −2.5 | Regulation of cell cycle                                       |
| NM_004404                              | Neural precursor cell expressed, developmentally down-regulated 5  | NC   | −2.8 | Cell cycle; cytokinesis                                        |
| NM_006431                              | Chaperonin-containing TCP1, subunit 2 (beta)                       | NC   | −3.2 | Cyclin E maturation                                            |
| M27281                                 | Vascular endothelial growth factor (VEGF)                          | NC   | −3.9 | Mitogen that specifically acts on endothelial cells            |
| NM_078487                              | Cyclin-dependent kinase inhibitor 2B (p15, inhibits CDK4) (CDKN2B) | NC   | −4.1 | Inhibits CDK4 and induces G1-phase cell cycle arrest           |
| <b>Extracellular matrix</b>            |                                                                    |      |      |                                                                |
| AK023795                               | Disintegrin-like and MMP with thrombospondin type 1 motif          | 1.9  | NC   | Collagen catabolism                                            |
| NM_004659                              | Matrix metalloproteinase 23A (MMP23A)                              | −4.7 | NC   | Peptidase                                                      |
| R72286                                 | Microfibrillar-associated protein 4                                | −6.4 | NC   | Cell adhesion                                                  |
| AK023365                               | Liprin-alpha4                                                      | −8.6 | NC   | Regulation of cell-matrix interactions                         |
| U48734                                 | Non-muscle alpha-actinin                                           | NC   | 2.3  | Attachment of microfilament bundles to adherens-type junctions |
| NM_002421                              | Matrix metalloproteinase 1 (MMP1)                                  | NC   | 2.1  | Collagen I, II and III catabolism                              |
| NM_004995                              | Matrix metalloproteinase 14 (MMP14)                                | NC   | 1.8  | Activator of progelatinase A                                   |
| NM_000495                              | Collagen, type IV, alpha 5                                         | NC   | −1.7 | Basement membrane component                                    |
| NM_001845                              | Collagen, type IV, alpha 1 (COL4A1)                                | NC   | −1.9 | Cell-cell interactions                                         |
| NM_000362                              | Tissue inhibitor of metalloproteinase-3                            | NC   | −2   | Metalloendopeptidase inhibitor                                 |
| BE350145                               | Collagen, type VI, alpha 1                                         | NC   | −2.6 | Component of microfibrillar structures                         |
| NM_000138                              | Fibrillin 1                                                        | NC   | −3   | Component of extracellular microfibrils                        |
| U77706                                 | Laminin alpha 4 chain (LAMA4)                                      | NC   | −4   | Non-collagenous constituent of basement membranes              |
| AV721177                               | Phosphatidylinositol-binding clathrin assembly protein             | NC   | −4.5 | Protein complex assembly; vesicle-mediated transport           |
| NM_003246                              | Thrombospondin 1                                                   | NC   | −8.2 | Angiogenic activity                                            |
| <b>Receptors and membrane proteins</b> |                                                                    |      |      |                                                                |
| NM_004334                              | Bone marrow stromal cell antigen 1 (BST1)                          | 5.4  | NC   | Facilitates pre-B-cell growth                                  |
| U01157                                 | Glucagon-like peptide-1 receptor                                   | 3.4  | NC   | Stimulator of glucose-induced insulin secretion                |
| M90657                                 | Transmembrane 4 superfamily member 1 (TM4SF1)                      | 2.8  | 2.1  | Protein complex assembly; tumour metastasis                    |
| AF043498                               | Prostate stem cell antigen (PSCA)                                  | 2.7  | NC   | Prostrate cancer progression                                   |
| NM_000527                              | Low-density lipoprotein receptor (LDLR)                            | 1.9  | NC   | Lipoprotein metabolism                                         |
| NM_000916                              | Oxytocin receptor (OXTR)                                           | 1.5  | NC   | Binds oxytocin and vasopressin; uterine contraction            |
| NM_000794                              | D-1 dopamine receptor                                              | −1.4 | NC   | Modulate NMDA glutamate receptor gated currents                |
| NM_031220                              | PYK2 N-terminal domain-interacting receptor 1 (NIR1)               | −5.6 | NC   | Receptor PTK; phosphoinositide transporter                     |
| BC000069                               | Retinoic acid receptor responder 2                                 | −7.4 | NC   | Retinoid metabolism                                            |
| NM_002081                              | Glypican 1 (GPC1)                                                  | NC   | 9.4  | Important in endostatin-mediated inhibition of angiogenesis    |
| AF020314                               | Leukocyte membrane antigen (CMRF-35H)                              | NC   | 4.7  | May play a regulatory role in leukocyte function               |

Table S1 Continued.

| Accession number           | Gene title                                                       | 3 h        | 21 h        | Function                                                            |
|----------------------------|------------------------------------------------------------------|------------|-------------|---------------------------------------------------------------------|
| U72069                     | Karyopherin (importin) beta 2                                    | NC         | <b>3.7</b>  | Targets cytoplasmic proteins to the nucleus                         |
| NM_000319                  | Peroxisome receptor 1 (PXR1)                                     | NC         | <b>3.4</b>  | Protein-peroxisome targeting                                        |
| AK022910                   | Nuclear transport receptor; transportin-SR                       | NC         | <b>2.8</b>  | Nucleocytoplasmic transport                                         |
| NM_004616                  | Transmembrane 4 superfamily member 3 (TM4SF3)                    | NC         | <b>2.5</b>  | Protein complex assembly                                            |
| AI859060                   | Cholinergic receptor, epsilon polypeptide                        | NC         | <b>2.1</b>  | Synaptic transmission                                               |
| NM_003801                  | GPI anchor attachment protein 1 (GPAA1)                          | NC         | <b>2.1</b>  | Links proteins to cell membrane                                     |
| NM_014045                  | Low-density lipoprotein receptor-related protein 10 (LRP10)      | NC         | <b>2</b>    | Lipoprotein metabolism                                              |
| BC000389                   | Transmembrane 4 superfamily member 7 (TM4SF7)                    | NC         | <b>2</b>    | Protein complex assembly                                            |
| NM_004639                  | HLA-B-associated transcript-3 (BAT3)                             | NC         | 1.8         | MHC-interacting protein                                             |
| NM_000376                  | Vitamin D (1,25-dihydroxyvitamin D3) receptor (VDR)              | NC         | 1.7         | Regulation of transcription; cell cycle arrest and apoptosis        |
| NM_000176                  | Nuclear receptor subfamily 3, group C, member 1                  | NC         | -1.7        | Glucocorticoid receptor; regulation of transcription, DNA-dependent |
| NM_003999                  | Oncostatin M receptor (OSMR)                                     | NC         | -2.4        | IL6 cell surface receptor-linked signal transduction                |
| NM_003144                  | Signal sequence receptor, alpha (SSR1)                           | NC         | -2.7        | Cotranslational membrane targeting                                  |
| U50748                     | Leptin receptor short form (db)                                  | NC         | -2.8        | Gene transcription via activation of STAT                           |
| U52914                     | Leptin receptor                                                  | NC         | -5.3        | Gene transcription via activation of STAT                           |
| NM_002888                  | Retinoic acid receptor responder 1 (RARRES1)                     | NC         | -5.3        | Negative regulation of cell proliferation                           |
| <b>Signal transduction</b> |                                                                  |            |             |                                                                     |
| NM_003979                  | Retinoic acid-induced 3 (RAI3)                                   | <b>9.8</b> | NC          | Metabotropic glutamate, GABA-B-like receptor                        |
| BC000737                   | Regulator of G-protein signalling                                | <b>6.6</b> | NC          | Regulates G-protein-coupled receptor signalling                     |
| BC001051                   | ADP-ribosylation factor-like 7                                   | <b>4.7</b> | <b>4.6</b>  | Small GTPase-mediated signalling                                    |
| AF091395                   | Triple functional domain (PTPRF interacting)                     | <b>3.2</b> | NC          | Receptor protein tyrosine phosphatase signalling                    |
| AY00716                    | EH domain-containing 1 (EHD1)                                    | <b>3</b>   | NC          | Endocytosis of IGF1 receptors                                       |
| M16591                     | Haemopoietic cell kinase (HCK)                                   | <b>2.9</b> | NC          | Protein tyrosine kinase activity                                    |
| BE737620                   | Myosin phosphatase, target subunit 1                             | <b>2.9</b> | NC          | Regulates phosphatidylinositol signalling system                    |
| BE466525                   | Ecotropic viral integration site 1(EV1)                          | <b>2.8</b> | NC          | JUN kinase-binding; protein kinase inhibitor                        |
| NM_005544                  | Insulin receptor substrate 1 (IRS1)                              | <b>2.8</b> | NC          | Stimulates mitogenesis                                              |
| NM_006482                  | Dual-specificity tyrosine-(Y)-phosphorylation-regulated kinase 2 | <b>2.7</b> | NC          | Protein phosphorylation                                             |
| AF238083                   | Sphingosine kinase 1 (SPHK1)                                     | <b>2.7</b> | NC          | Sphingosine metabolism                                              |
| AB026436                   | Dual-specificity phosphatase 10                                  | <b>2.3</b> | NC          | Inactivate MAPKs                                                    |
| AA780381                   | MAP2 kinase 3 (ERK kinase 3)                                     | <b>2.3</b> | NC          | Protein phosphorylation                                             |
| NM_003749                  | Insulin receptor substrate-2 (IRS2)                              | <b>2.2</b> | NC          | Stimulates mitogenesis                                              |
| AB023137                   | A kinase (PRKA) anchor protein 2 (AKAP2)                         | <b>2.2</b> | 1.8         | Activates adenylate cyclase                                         |
| AF015043                   | SH3-domain-binding protein 4 (SH3BP4)                            | <b>2.1</b> | NC          | Signal transducer activity                                          |
| NM_005104                  | Bromodomain-containing 2 (BRD2)                                  | <b>2</b>   | NC          | Protein serine/threonine kinase activity                            |
| AB003476                   | Gravin; A kinase (PRKA) anchor protein 12                        | <b>2</b>   | NC          | G-protein-coupled receptor protein signalling                       |
| U77914                     | Jagged 1 (JAG1)                                                  | <b>2</b>   | NC          | G-protein-coupled receptor protein signalling                       |
| BC000370                   | MKP-1-like protein tyrosine phosphatase (MKP-L)                  | 1.9        | NC          | Protein dephosphorylation                                           |
| NM_004414                  | Down syndrome critical region gene 1 (DSCR1)                     | 1.8        | NC          | Regulates calcineurin-mediated signalling                           |
| NM_002053                  | Interferon-inducible guanylate-binding protein 1 (GBP1)          | 1.8        | NC          | GTPase activity                                                     |
| AL137750                   | Ethanolamine kinase                                              | 1.4        | NC          | Glycerolipid metabolism                                             |
| NM_002648                  | Protein kinase-related oncogene (PIM1)                           | -2.9       | NC          | Haematopoietic development                                          |
| L37882                     | Frizzled homology 2 (FZD2)                                       | -2.9       | <b>2.2</b>  | Signal transduction; intracellular Ca release                       |
| NM_005204                  | MAP3 kinase 8 (MAP3K8)                                           | -3         | NC          | Ser/thr kinase; regulation of cellular transformation               |
| NM_004842                  | A kinase (PRKA) anchor protein 7 (AKAP7)                         | -3.9       | NC          | Protein kinase A anchor protein activity                            |
| NM_003745                  | Suppressor of cytokine signalling-1 (SOCS-1)                     | -4         | NC          | JAK-STAT cascade inhibitor                                          |
| NM_002224                  | Inositol 1,4,5-triphosphate receptor, type 3 (ITPR3)             | NC         | <b>16.8</b> | IP3-sensitive calcium-release channel activity                      |

Table S1 Continued.

| Accession number | Gene title                                                       | 3 h | 21 h        | Function                                                  |
|------------------|------------------------------------------------------------------|-----|-------------|-----------------------------------------------------------|
| U93181           | Nuclear dual-specificity phosphatase (SBF1)                      | NC  | <b>11.4</b> | Protein dephosphorylation                                 |
| NM_004672        | MAP 3 kinase 6 (MAP3K6)                                          | NC  | <b>8.4</b>  | Protein kinase activity                                   |
| NM_003646        | Diacylglycerol kinase, zeta (DGKZ)                               | NC  | <b>6.8</b>  | Phosphatidylinositol signalling                           |
| NM_030981        | Small GTP-binding protein (RAB1B)                                | NC  | <b>4.3</b>  | Ras; small monomeric GTPase activity                      |
| AF272035         | Rag C protein (GTR2)                                             | NC  | <b>3.4</b>  | Small monomeric GTPase activity                           |
| U96922           | Inositol polyphosphate-4-phosphatase, type II alpha              | NC  | <b>3.3</b>  | Regulates phosphatidylinositol signalling system          |
| BF062886         | Vaccinia-related kinase 3 (VRK3)                                 | NC  | <b>3.3</b>  | Protein phosphorylation                                   |
| AV700224         | Casein kinase 1, delta                                           | NC  | <b>3.1</b>  | Protein phosphorylation                                   |
| NM_017572        | G-protein-coupled receptor kinase 7 (GPRK7)                      | NC  | <b>2.7</b>  | Protein phosphorylation                                   |
| BE138888         | GTP-binding protein Rac2                                         | NC  | <b>2.6</b>  | Small GTPase-mediated signal transduction                 |
| AF022212         | Rho GTPase activating protein 6 isoform 2                        | NC  | <b>2.6</b>  | Actin filament polymerization                             |
| NM_002547        | Oligophrenin 1 (OPHN1)                                           | NC  | <b>2.5</b>  | Rho GTPase activating protein; cell migration             |
| M55268           | Casein kinase 2, alpha prime polypeptide (CSNK2A2)               | NC  | <b>2.3</b>  | Protein phosphorylation                                   |
| NM_016602        | CC chemokine receptor 10 (CCR10)                                 | NC  | <b>2.3</b>  | G-protein-coupled receptor protein signalling             |
| NM_006182        | Discoidin domain receptor family, member 2 (DDR2)                | NC  | <b>2.3</b>  | Receptor protein tyrosine kinase                          |
| NM_002712        | Protein phosphatase 1, regulatory subunit 7 (PPP1R7)             | NC  | <b>2.2</b>  | Protein dephosphorylation                                 |
| NM_001569        | Interleukin-1 receptor-associated kinase 1 (IRAK1)               | NC  | <b>1.8</b>  | NF-kappaB-inducing kinase activity                        |
| BC000265         | Rho/rac guanine nucleotide exchange factor (GEF) 2               | NC  | <b>1.8</b>  | Cell shape and cell size control                          |
| AF179867         | STE20-like kinase (JIK)                                          | NC  | <b>1.8</b>  | Inhibits JNK pathway                                      |
| M29893           | V-ras simian leukaemia oncogene homologue A (ras related) (RALA) | NC  | <b>1.8</b>  | Small GTPase-mediated signalling; chemotaxis              |
| NM_021106        | Regulator of G-protein signalling 3 (RGS3)                       | NC  | <b>1.7</b>  | Inactivation of MAPK                                      |
| U48705           | Receptor tyrosine kinase (DDR)                                   | NC  | <b>1.6</b>  | Receptor protein tyrosine kinase signalling               |
| NM_004126        | Guanine nucleotide-binding protein 11 (GNG11)                    | NC  | <b>1.5</b>  | Heterotrimeric G-protein GTPase                           |
| AF004222         | Reticulon 2 (RTN2)                                               | NC  | <b>1</b>    | Signal transducer activity                                |
| AF084943         | Multiple inositol polyphosphate phosphatase                      | NC  | <b>-1.6</b> | Inactivates inositol polyphosphates                       |
| NM_002595        | PCTAIRE protein kinase 2 (PCTK2)                                 | NC  | <b>-1.6</b> | Regulation of cell cycle                                  |
| NM_004087        | Discs, large ( <i>Drosophila</i> ) homologue 1                   | NC  | <b>-1.7</b> | Intracellular signalling cascade                          |
| NM_002074        | Guanine nucleotide-binding protein, beta polypeptide 1           | NC  | <b>-1.7</b> | Signal transduction; protein kinase C activation          |
| NM_005813        | Protein kinase C, nu (PRKCN)                                     | NC  | <b>-1.7</b> | PKC activity; regulates differentiation and proliferation |
| D13988           | GDP dissociation inhibitor 2 (GDI2)                              | NC  | <b>-1.8</b> | Rab GTPase activator activity                             |
| AB000888         | Phosphatidic acid phosphatase 2a                                 | NC  | <b>-1.8</b> | Formation of DAG from phosphatidic acid; PLD1 signalling  |
| NM_002709        | Protein phosphatase 1, catalytic subunit, beta isoform           | NC  | <b>-1.8</b> | Protein dephosphorylation                                 |
| AB009358         | MAP2 kinase 7; JNK-activating kinase 2                           | NC  | <b>-2</b>   | Specific activator of JNK1 and JNK2                       |
| NM_002356        | Myristoylated alanine-rich protein kinase C substrate (MARCKS)   | NC  | <b>-2</b>   | A filamentous actin cross-linking protein                 |
| NM_012250        | Oncogene TC21 (TC21)                                             | NC  | <b>-2</b>   | Small GTPase-mediated signal transduction                 |
| NM_000291        | Phosphoglycerate kinase 1 (PGK1)                                 | NC  | <b>-2</b>   | Phosphoglycerate kinase activity                          |
| NM_005607        | PTK2 protein tyrosine kinase 2 (PTK2)                            | NC  | <b>-2</b>   | Protein kinase activity                                   |
| NM_003022        | SH3 domain-binding glutamic acid-rich protein-like (SH3BGR1)     | NC  | <b>-2</b>   | SH3/SH2 adaptor protein activity                          |
| NM_022650        | GTPase-activating protein (GAP)                                  | NC  | <b>-2.1</b> | Bind-activated Rho GTPases and stimulate GTP hydrolysis   |
| NM_005261        | GTP-binding protein overexpressed in skeletal muscle (GEM)       | NC  | <b>-2.1</b> | Small GTPase-mediated signal transduction                 |
| NM_004578        | Ras-associated protein (RAB4)                                    | NC  | <b>-2.1</b> | Rho small monomeric GTPase activity                       |
| AI571798         | Rho GDP dissociation inhibitor (GDI) alpha                       | NC  | <b>-2.1</b> | Negative regulation of cell adhesion                      |
| NM_006241        | Protein phosphatase 1, regulatory (inhibitor) subunit 2 (PPP1R2) | NC  | <b>-2.2</b> | Ser-/thr-specific protein phosphatase inhibitor           |
| AL136139         | Enhancer of filamentation 1 (HEF1)                               | NC  | <b>-2.3</b> | Integrin-initiated cytoskeleton-linked signalling         |
| NM_016322        | GTPase Rab14                                                     | NC  | <b>-2.3</b> | Ras; small monomeric GTPase activity                      |
| BC005122         | ADP-ribosylation factor GTPase activating protein 1              | NC  | <b>-2.4</b> | Regulation of signalling, growth by hydrolysis of GTP     |

Table S1 Continued.

| Accession number                     | Gene title                                                   | 3 h  | 21 h | Function                                                          |
|--------------------------------------|--------------------------------------------------------------|------|------|-------------------------------------------------------------------|
| AF218074                             | MAP3 kinase 7                                                | NC   | -2.4 | Phosphorylates MKK6 to stimulate JNK; NFkB translocation          |
| AF001362                             | Jak2 kinase (JAK2)                                           | NC   | -2.5 | Protein tyrosine kinase activity; JAK-STAT cascade                |
| NM_002731                            | Protein kinase, cAMP-dependent, catalytic, beta (PRKACB)     | NC   | -2.6 | Protein kinase activity                                           |
| NM_002716                            | Protein phosphatase 2 regulatory subunit A beta isoform      | NC   | -2.6 | Regulation of proliferation, contraction, transcription           |
| AF002280                             | Alpha-actinin-2-associated LIM protein alternatively spliced | NC   | -2.7 | Interacts with alpha-actinin-2 in cytoskeletal assembly           |
| NM_003507                            | Frizzled ( <i>Drosophila</i> ) homologue 7 (FZD7)            | NC   | -2.7 | Fz7-mediated signalling controls cell-sorting in mesoderm         |
| NM_004161                            | RAB1, member RAS oncogene family                             | NC   | -2.7 | Small GTPase-mediated signalling; vesicle-mediated transport      |
| J03005                               | G-protein alpha-inhibiting activity polypeptide 3 (GNAI3)    | NC   | -2.8 | G-protein coupled-receptor protein signalling pathway             |
| NM_003463                            | Protein tyrosine phosphatase type IVA, member 1              | NC   | -2.9 | Protein dephosphorylation; oncogenesis                            |
| NM_006575                            | MAP 4 kinase 5                                               | NC   | -3   | activates JNK but not ERK1                                        |
| M18468                               | Protein kinase, cAMP-dependent, regulatory, type I, alpha    | NC   | -3.1 | cAMP-dependent protein kinase                                     |
| NM_001506                            | G-protein-coupled receptor 32 (GPR32)                        | NC   | -3.2 | G-protein-coupled receptor protein signalling                     |
| NM_005242                            | Coagulation factor II (thrombin) receptor-like 1 (F2RL1)     | NC   | -3.3 | G-protein-coupled receptor protein signalling pathway             |
| AF092132                             | p21 (CDKN1A)-activated kinase 2 (PAK2)                       | NC   | -3.5 | Negative regulation of protein kinase activity                    |
| NM_000945                            | Calcineurin B, type I (CNB1)                                 | NC   | -3.6 | Ca-dependent Ser/Thr phosphatase activity; calcium binding        |
| NM_004162                            | RAB5A, member RAS oncogene family                            | NC   | -3.6 | Bind GTP and exhibits GTPase activity; regulation of endocytosis  |
| X75208                               | HEK2 protein tyrosine kinase receptor                        | NC   | -3.7 | Receptor tyrosine kinase signalling                               |
| NM_006654                            | FGF receptor substrate 2 (FRS2)                              | NC   | -3.8 | FGF signalling; cell growth and differentiation                   |
| NM_003688                            | Calcium Calmodulin-dependent serine protein kinase (CASK)    | NC   | -4.2 | Cytoskeletal membrane scaffold; cortical cytoskeleton signalling  |
| AF127481                             | Dual-specificity phosphatase 1 (DUSP1)                       | NC   | -4.4 | Dephosphorylate and inactivates p44MAPK (ERK1)                    |
| AW665024                             | Protein tyrosine kinase 9                                    | NC   | -4.7 | Protein phosphorylation                                           |
| NM_016277                            | RAB23, member RAS oncogene family                            | NC   | -4.9 | Small GTPase-mediated signalling; intracellular protein transport |
| S69182                               | Protein tyrosine phosphatase (PTPG1); non-receptor type 12   | NC   | -5.5 | Protein dephosphorylation                                         |
| NM_001346                            | Diacylglycerol kinase, gamma (DGKG)                          | NC   | -5.6 | PKC activation                                                    |
| Z25435                               | Protein-ser/thr kinase gene                                  | NC   | -5.8 | Protein phosphorylation                                           |
| AF051311                             | Ras-GTPase-activating protein SH3 domain-binding protein 2   | NC   | -6.1 | RAS protein signal transduction                                   |
| NM_002184                            | gp130, oncostatin M receptor                                 | NC   | -7   | Cell surface receptor-linked signal transduction                  |
| NM_002869                            | RAB6, member RAS oncogene family                             | NC   | -7.4 | Small GTPase-mediated signalling; non-selective vesicle transport |
| AF021233                             | TRAIL-R4-B TNFR superfamily, member 10d                      | NC   | -8   | Decoy with truncated death domain; apoptosis                      |
| <b>Transcription and translation</b> |                                                              |      |      |                                                                   |
| U12767                               | Mitogen-induced nuclear orphan receptor (MINOR)              | 37.9 | NC   | Regulation of transcription, DNA-dependent                        |
| N32859                               | Nuclear receptor subfamily 1, group D, member 2              | 8    | NC   | Regulation of transcription, DNA-dependent                        |
| NM_004405                            | Distal-less homoeobox 2 (DLX2)                               | 5.1  | -1.6 | Regulation of transcription, DNA-dependent                        |
| S77154                               | Beta-type transcription factor homologue human               | 3.2  | NC   | Regulation of transcription, DNA-dependent                        |
| NM_004904                            | cAMP response element-binding protein CRE-Bpa                | 2.9  | -1.5 | Transcription factor activated by translocation of PKC            |
| NM_006981                            | Nuclear receptor subfamily 4, group A, member 3 (NR4A3)      | 2.8  | NC   | Regulation of transcription, DNA-dependent                        |
| NM_004472                            | Forkhead box D1 (FOXO1)                                      | 2.6  | NC   | Regulation of transcription, DNA-dependent                        |
| AL021977                             | V-maf musculoaponeurotic fibrosarcoma oncogene homologue F   | 2.2  | 2.2  | Regulation of transcription, DNA-dependent                        |

Table S1 Continued.

| Accession number | Gene title                                                        | 3 h  | 21 h | Function                                                               |
|------------------|-------------------------------------------------------------------|------|------|------------------------------------------------------------------------|
| NM_003201        | Transcription factor 6-like 1 (TCF6L1)                            | 2.1  | NC   | Mitochondrial DNA transcriptional activator                            |
| NM_022898        | B-cell lymphomaleukaemia 11B (BCL11B)                             | 2    | NC   | Regulation of transcription, zinc finger protein                       |
| NM_002114        | HIV type I enhancer-binding protein 1 (HIVEP1)                    | 1.9  | NC   | Regulation of transcription, DNA-dependent                             |
| AI378706         | Calreticulin (CALR)                                               | -1.4 | NC   | Calcium ion storage; transcription regulation                          |
| NM_001706        | B-cell CLL/lymphoma 6 (zinc finger protein 51) (BCL6)             | -1.9 | NC   | Regulation of transcription; oncogenesis                               |
| AF119334         | Zinc finger protein multitype 2 (ZFPM2)                           | -1.9 | NC   | Transcriptional activity                                               |
| M83667           | CCAAT-enhancer-binding protein (CEBP), delta (CEBPD)              | -2.1 | NC   | Regulation of transcription, DNA-dependent                             |
| L07648           | MAX-interacting protein 1 (MXI1)                                  | -2.1 | NC   | Transcription factor                                                   |
| NM_005384        | Nuclear factor, interleukin 3-regulated (NFIL3)                   | -2.2 | NC   | Transcriptional co-repressor                                           |
| BE542323         | TONDU                                                             | -2.2 | NC   | Regulation of transcription, DNA-dependent                             |
| NM_014112        | Trichorhinophalangeal syndrome I gene (TRPS1)                     | -2.2 | NC   | Zinc finger transcription factor                                       |
| NM_003670        | Basic helix-loop-helix domain-containing, class B, 2              | -2.4 | -3.9 | Regulation of transcription, DNA-dependent                             |
| BG250310         | Zinc finger protein 36, C3H type-like 1 (ZFP36L1)                 | -2.9 | NC   | Transcription factor                                                   |
| AF055993         | Sin3-associated polypeptide (SAP30)                               | -3.2 | NC   | Transcription co-repressor activity                                    |
| NM_020529        | NFκ light polypeptide gene enhancer in B-cells inhibitor, alpha   | -3.3 | NC   | Cytoplasmic sequestering of NF-κappaB                                  |
| NM_030751        | Transcription factor 8 (TCF8)                                     | -3.3 | -4.3 | Represses interleukin 2 expression                                     |
| NM_004527        | Mesenchyme homoeobox 1 (MEOX1), transcript variant 1              | -4.4 | -3.2 | Homoeobox; transcription factor activity                               |
| NM_005526        | Heat shock transcription factor 1 (HSF1)                          | NC   | 11   | Regulation of transcription, DNA-dependent                             |
| AB015332         | Neighbour of A-kinase anchoring protein 95                        | NC   | 6.1  | DEAD/H-box RNA helicase binding                                        |
| NM_005483        | Chromatin assembly factor 1, subunit A (CHAF1A)                   | NC   | 5.5  | Assembles histone octamers onto replicating DNA                        |
| NM_003597        | TGFB inducible early growth response 2                            | NC   | 5.5  | Transcriptional regulator                                              |
| NM_004083        | DNA-damage-inducible transcript 3                                 | NC   | 4.3  | A dominant-negative inhibitor of C/EBP and LAP                         |
| AL161985         | Transcription factor binding to IGHM enhancer 3                   | NC   | 4.2  | Regulation of transcription, DNA-dependent                             |
| AF106934         | Thyroid hormone receptor-associated protein (TRAP95)              | NC   | 3.7  | Transcription co-activator                                             |
| M64497           | Nuclear receptor subfamily 2, group F, member 2                   | NC   | 3.5  | Transcription co-repressor activity                                    |
| AB019219         | Similar to yeast pre-mRNA splicing factors, Prp1Zer1 and Prp6     | NC   | 3.5  | Spliceosome assembly                                                   |
| U67734           | HIV-1 Tat interactive protein                                     | NC   | 3.2  | Transcriptional co-activator                                           |
| NM_005859        | Purine-rich element-binding protein A (PURA)                      | NC   | 3.2  | Regulation of transcription, binds to GAGA boxes                       |
| X72631           | Rev-ErbA alpha                                                    | NC   | 3    | Regulation of transcription, DNA-dependent                             |
| U19769           | Centromere protein F (mitosin) (CENPF)                            | NC   | 2.8  | Regulation of mitosis                                                  |
| NM_014140        | HepA-related protein (HARP)                                       | NC   | 2.8  | ATP dependent helicase                                                 |
| AC004908         | Ribosomal protein L23a                                            | NC   | 2.8  | Protein biosynthesis                                                   |
| NM_006943        | SRY (sex-determining region Y)-box 22 (SOX22)                     | NC   | 2.8  | Regulation of transcription from Pol II promoter                       |
| NM_020310        | MAX-binding protein (MNT)                                         | NC   | 2.7  | Regulation of transcription; negative regulation of cell proliferation |
| BC002704         | Signal transducer and activator of transcription 1 (STAT1)        | NC   | 2.7  | Transcription from Pol II promoter                                     |
| AF295773         | Ral guanine nucleotide dissociation stimulator (RALGDS)           | NC   | 2.6  | RAS protein signal transduction                                        |
| AF055078         | Zinc finger protein 42 (ZNF42)                                    | NC   | 2.6  | Regulation of transcription, DNA-dependent                             |
| U79283           | Albumin D-box-binding protein                                     | NC   | 2.5  | Regulation of transcription                                            |
| AI884867         | Ribosomal protein L26                                             | NC   | 2.4  | Protein biosynthesis                                                   |
| NM_006736        | Hsp, neuronal DNAJ-like 1 (HSJ1) subfamily B, member 2            | NC   | 2.2  | Co-chaperone activity                                                  |
| NM_004176        | Sterol regulatory element-binding transcription factor 1 (SREBF1) | NC   | 2.2  | Regulation of transcription; LDL metabolism regulation                 |
| NM_014292        | Chromobox homologue 6                                             | NC   | 2.1  | Regulation of transcription; chromatin modification                    |
| AW517464         | Ribosomal protein L3                                              | NC   | 2.1  | Protein biosynthesis                                                   |
| AA679705         | Eukaryotic translation initiation factor 3, subunit 8             | NC   | 1.9  | Regulation of translational initiation                                 |

Table S1 Continued.

| Accession number | Gene title                                                   | 3 h | 21 h | Function                                                       |
|------------------|--------------------------------------------------------------|-----|------|----------------------------------------------------------------|
| NM_006084        | Interferon-stimulated transcription factor 3, gamma (ISGF3G) | NC  | 1.8  | An interferon-dependent, transcription factor                  |
| NM_002105        | H2A histone family, member X (H2AFX)                         | NC  | 1.6  | Nucleosomal organization of chromatin                          |
| BC004973         | Signal transducer and activator of transcription 6 (STAT6)   | NC  | 1.6  | Transcription from Pol II promoter                             |
| AF295773         | Ral guanine nucleotide dissociation stimulator               | NC  | 1.5  | Dissociation of guanine nucleotides from ralA and ralB GTPases |
| NM_005066        | Splicing factor proline-/glutamine-rich                      | NC  | -1.5 | mRNA splicing                                                  |
| AF080569         | DnaJ (Hsp40) homologue, subfamily B, member 6                | NC  | -1.6 | Response to stress                                             |
| M93255           | Friend leukaemia virus integration 1 (FLI-1)                 | NC  | -1.6 | Regulation of transcription                                    |
| AV721430         | Transcription factor 7-like 2 (T-cell-specific, HMG-box)     | NC  | -1.7 | Regulation of transcription, DNA-dependent                     |
| NM_003074        | BRG1-associated factor 155 (BAF155)                          | NC  | -1.8 | SWI-/SNF-related; chromatin assembly/disassembly               |
| NM_006079        | Cbpb300-interacting transactivator (CITED2)                  | NC  | -1.8 | Regulation of transcription from Pol II promoter               |
| AL136810         | TBP-interacting protein                                      | NC  | -1.8 | Regulation of transcription                                    |
| BC001449         | Heterogeneous nuclear ribonucleoprotein R (HNRPR)            | NC  | -1.9 | mRNA processing                                                |
| AF147209         | Interleukin enhancer-binding factor 3 (ILF3)                 | NC  | -1.9 | RNA polymerase II transcription factor activity                |
| AJ270770         | T-cell transcription factor-4 (TCF-4)                        | NC  | -1.9 | Regulation of transcription                                    |
| NM_006526        | Zinc finger protein 217 (ZNF217)                             | NC  | -1.9 | Regulation of transcription; oncogenesis                       |
| NM_003925        | Methyl-CpG-binding endonuclease (MED1)                       | NC  | -2   | DNA repair                                                     |
| NM_000176.1      | Nuclear receptor subfamily 3, group C, member 1 (NR3C1)      | NC  | -2   | Regulation of transcription, DNA-dependent                     |
| AF098483         | PC4- and SFRS1-interacting protein 2 (PSIP2)                 | NC  | -2   | Transcriptional co-activators                                  |
| AK026426.1       | SWI-/SNF-related, matrix-associated, subfamily a, member 1   | NC  | -2   | Chromatin modelling                                            |
| NM_004500        | Heterogeneous nuclear ribonucleoprotein C (C1C2)             | NC  | -2.1 | mRNA splicing                                                  |
| NM_014319        | Integral inner nuclear membrane protein (MAN1)               | NC  | -2.1 | Nuclear membrane localization                                  |
| NM_005324        | H3 histone, family 3B (H3.3B)                                | NC  | -2.2 | Nucleosome assembly                                            |
| D13889           | Inhibitor of DNA binding 1 (ID1)                             | NC  | -2.2 | Regulation of transcription from Pol II promoter               |
| AK021418         | Putative RNA helicase                                        | NC  | -2.2 | rRNA processing                                                |
| BC000451         | Splicing factor, arginine-/serine-rich 10                    | NC  | -2.2 | mRNA splicing                                                  |
| AL136621         | Zinc finger protein 198                                      | NC  | -2.2 | Protein binding                                                |
| NM_004379        | cAMP responsive element-binding protein 1                    | NC  | -2.3 | Regulation of transcription, DNA-dependent                     |
| M62829           | Early growth response 1 (EGR1)                               | NC  | -2.3 | Regulation of transcription                                    |
| AA679988         | Polypyrimidine tract-binding protein 1 (PTPB1)               | NC  | -2.3 | mRNA splicing                                                  |
| BC000627         | Signal transducer and activator of transcription 3 (STAT 3)  | NC  | -2.3 | JAK-STAT cascade; transcription factor activity                |
| NM_012266        | DnaJ (Hsp40) homologue, subfamily B, member 5                | NC  | -2.4 | Response to stress                                             |
| BC000806         | Polymerase (RNA) II (DNA-directed) polypeptide K (POLR2K)    | NC  | -2.4 | Transcription from Pol III promoter                            |
| NM_003016        | Splicing factor, arginine-/serine-rich 2                     | NC  | -2.4 | mRNA splicing                                                  |
| BC000997         | Splicing factor, arginine-/serine-rich 7 (SFRS7)             | NC  | -2.5 | mRNA processing                                                |
| AF309553         | Meiotic recombination protein REC14                          | NC  | -2.6 | Meiotic recombination                                          |
| NM_006902        | Paired mesoderm homoeobox 1a (PMX1a)                         | NC  | -2.6 | Regulation of transcription, DNA-dependent                     |
| AL117487         | Transcriptional adaptor 3-like (ADA3)                        | NC  | -2.6 | Transcriptional activity                                       |
| M94630           | Heterogeneous nuclear ribonucleoprotein D (HNRPD)            | NC  | -2.9 | RNA processing                                                 |
| D13891           | Inhibitor of DNA-binding 2 (ID2)                             | NC  | -2.9 | Transcriptional repressor                                      |
| AL553320         | Stress-induced-phosphoprotein 1 (STIP1)                      | NC  | -2.9 | Association of molecular chaperones HSP70 and HSP90            |
| L23959           | Transcription factor Dp-1 (TFDP1)                            | NC  | -2.9 | Regulation of transcription from Pol II promoter               |
| NM_006265        | RAD21 ( <i>Schizosaccharomyces pombe</i> ) homologue         | NC  | -3   | Chromosome segregation                                         |
| NM_006924        | Splicing factor, arginine-/serine-rich 1 (SFRS1)             | NC  | -3   | mRNA splice site selection                                     |
| NM_004779        | CCR4-NOT transcription complex, subunit 8 (CNOT8)            | NC  | -3.1 | Regulation of transcription, DNA-dependent                     |
| AF039942         | HCF-binding transcription factor Zhangfei (ZF)               | NC  | -3.2 | Regulation of transcription, DNA-dependent                     |



Table S1 Continued.

| Accession number     | Gene title                                                  | 3 h  | 21 h  | Function                                           |
|----------------------|-------------------------------------------------------------|------|-------|----------------------------------------------------|
| AB009023             | RNA guanylyltransferase and 5-phosphatase (RNGTT)           | NC   | −3.2  | mRNA capping                                       |
| NM_003017            | Splicing factor, arginine-/serine-rich 3 (SFRS3)            | NC   | −3.3  | mRNA splicing                                      |
| M97935               | Transcription factor ISGF-3                                 | NC   | −3.3  | IRF; transcription factor activity                 |
| BC001255             | Nuclear cap-binding protein subunit 2 (NCBP2)               | NC   | −3.5  | snRNA-nucleus export                               |
| U12170               | Zinc finger homeodomain protein; transcription factor 8     | NC   | −3.7  | Represses interleukin 2 expression                 |
| AF061261             | Muscleblind-like 2 ( <i>Drosophila</i> ) (MBNL2)            | NC   | −4.2  | Transcription factor activity                      |
| AF072814             | PHD finger DNA-binding protein isoform 1 (M96)              | NC   | −4.3  | Regulation of transcription, DNA-dependent         |
| BF983406             | Heterogeneous nuclear ribonucleoprotein H1                  | NC   | −4.4  | RNA processing                                     |
| NM_021038            | Muscleblind ( <i>Drosophila</i> )-like                      | NC   | −4.8  | Nucleic acid-binding activity                      |
| AI217362             | Trinucleotide repeat-containing 11 (THR-associated protein) | NC   | −5    | Regulation of transcription, DNA-dependent         |
| NM_006166            | Nuclear transcription factor Y, beta (NFYB)                 | NC   | −5.5  | Regulation of transcription, DNA-dependent         |
| U71300               | snRNA-activating protein complex subunit (SNAP50)           | NC   | −5.5  | snRNA transcription                                |
| NM_007034            | DnaJ (Hsp40) homologue, subfamily B, member 4               | NC   | −6.3  | Heat shock protein activity                        |
| M68891               | GATA-binding protein 2                                      | NC   | −7.3  | Regulation of transcription, DNA-dependent         |
| NM_004622            | Translin                                                    | NC   | −9    | A recombination hotspot-binding protein            |
| NM_001356            | DEAD/H box 3, X-linked (DDX3)                               | NC   | −9.5  | ATP-dependent RNA helicase                         |
| NM_004779            | Transcription complex, subunit 8                            | NC   | −12.4 | Regulation of transcription, DNA-dependent         |
| NM_003831            | SudD (suppressor of bimD6 homologue) (SUDD)                 | NC   | −12.5 | Chromosome segregation                             |
| Metabolism<br>J00146 | Dihydrofolate reductase pseudogene (psi-hd1)                | 5.4  | NC    | Converts dihydrofolate into tetrahydrofolate       |
| NM_002133            | Heme oxygenase (decycling) 1 (HMOX1)                        | 4.7  | 4.4   | Heme catabolism                                    |
| NM_000413            | Hydroxysteroid (17-beta) dehydrogenase 1 (HSD17B1)          | 4.6  | 5     | Oestrogen metabolism                               |
| NM_002640            | Serine proteinase inhibitor, clade B, member 8 (SERPINB8)   | 3.3  | NC    | Inactivates serine proteinases                     |
| BG035985             | 3-Hydroxy-3-methylglutaryl-coenzyme A synthase 1            | 2.4  | 2.3   | Lipid metabolism                                   |
| NM_003330            | Thioredoxin reductase 1 (TXNRD1)                            | 2.4  | 2.1   | Regulation of the intracellular redox environment  |
| NM_001902            | Cystathionase (CTH)                                         | 2.3  | NC    | Transforms cystathionine to cysteine               |
| NM_000859            | 3-Hydroxy-3-methylglutaryl-coenzyme A reductase (HMGCR)     | 2.2  | NC    | Cholesterol biosynthesis                           |
| BC005247             | Isopentenyl-diphosphate delta isomerase (IDI1)              | 2.2  | NC    | Cholesterol homeostasis                            |
| NM_005542            | Insulin-induced gene 1                                      | 2.2  | 2.3   | Biosynthesis of chondroitin sulfate                |
| AB017915             | Chondroitin 6-sulfotransferase                              | 1.9  | NC    | UDP-N-acetylglucosamine biosynthesis               |
| S73498               | UDP-N-acetylglucosamine pyrophosphorylase 1 (UAP1)          | 1.9  | NC    | Protein amino acid phosphorylation                 |
| NM_021158            | Chromosome 20 open reading frame 97 (C20orf97)              | 1.9  | 3.9   | Protein amino acid phosphorylation                 |
| AF155661             | Pyruvate dehydrogenase phosphatase (PDP)                    | 1.7  | NC    | Protein dephosphorylation                          |
| AL161952             | Glutamate-ammonia ligase                                    | 1.6  | NC    | Clearance of ammonia from circulation              |
| U25997               | Stanniocalcin 1 (STC1)                                      | −1.8 | NC    | Calcium ion homeostasis                            |
| NM_002615            | Serine proteinase inhibitor, clade F member 1 (SERPINF1)    | −2   | NC    | Serine proteinase inhibitor                        |
| NM_004566            | 6-Phosphofructo-2-kinasefructose-2,6-biphosphatase 3        | −2.2 | NC    | Fructose 2,6-bisphosphate metabolism               |
| NM_000963            | Prostaglandin-endoperoxide synthase 2 (PTGS2)               | −2.4 | −3.3  | Prostaglandin biosynthesis                         |
| D14874               | Adrenomedullin (ADM)                                        | −2.6 | NC    | Hormone                                            |
| D88308               | Fatty acid-CoA ligase, very long-chain 1 (FACVL1)           | −3.1 | NC    | Lipids synthesis and degradation of fatty acids    |
| AF153606             | PPAR (gamma) angiopoietin-related protein (PGAR)            | −3.1 | NC    | Regulation of lipid metabolism                     |
| NM_002600            | Phosphodiesterase 4B, cAMP-specific (PDE4B)                 | −3.3 | NC    | 3',5'-cyclic-nucleotide phosphodiesterase activity |
| AA621558             | Methionine-tRNA synthetase                                  | −4   | NC    | Protein biosynthesis                               |
| NM_001077            | UDP glycosyltransferase 2, polypeptide B17 (UGT2B17)        | −4   | NC    | Transferase activity                               |
| AL044326             | Phosphoribosylformylglycinamide synthase                    | −4.2 | NC    | Purine nucleotide biosynthesis                     |
| NM_005518            | 3-OH-3-methylglutaryl-CoA synthase 2 (HMGCS2)               | −4.3 | NC    | Cholesterol biosynthesis                           |

Table S1 Continued.

| Accession number | Gene title                                                | 3 h | 21 h  | Function                                                   |
|------------------|-----------------------------------------------------------|-----|-------|------------------------------------------------------------|
| NM_001873        | Carboxypeptidase E                                        | -6  | -10.8 | Protein catabolism                                         |
| D13287           | Glucosidase, beta; acid (GBA)                             | NC  | 27.9  | Sphingoglycolipid metabolism                               |
| NM_002861        | Phosphate cytidylyltransferase 2, ethanolamine            | NC  | 8.8   | Converts ethanolamine to CDP-ethanolamine                  |
| AB021638         | APP-binding, family A, member 3 (APBA3)                   | NC  | 7.7   | Regulates APP processing                                   |
| NM_003364        | Uridine phosphorylase (UP)                                | NC  | 6.6   | Phosphorolysis of uridine to ribose-1-phosphate            |
| M80927           | Chitinase 3-like 1 (CHI3L1)                               | NC  | 6     | Metabolism of chitin                                       |
| AF096304         | Transmembrane 7 superfamily member 2 (TM7SF2)             | NC  | 5.8   | Sterol biosynthesis                                        |
| NM_001247        | Ectonucleoside triphosphate diphosphohydrolase 6 (ENTPD6) | NC  | 5.4   | Catabolism of extracellular nucleotides                    |
| AL022394         | DNA topoisomerase I (TOP 1)                               | NC  | 4.9   | Catalyse the breaking and rejoining of DNA strands         |
| NM_021920        | Secretin (SCT)                                            | NC  | 4.6   | Pancreatic juice secretion                                 |
| NM_000402        | Glucose-6-phosphate dehydrogenase (G6PD)                  | NC  | 3.4   | Pentose-phosphate shunt pathway                            |
| NM_001360        | 7-Dehydrocholesterol reductase (DHCR7)                    | NC  | 3.2   | Converts 7-DHC to cholesterol                              |
| AF148509         | Alpha 1,2-mannosidase                                     | NC  | 3.2   | Carbohydrate metabolism                                    |
| AF113123         | Carbonyl reductase                                        | NC  | 3.2   | NADPH-dependent oxidoreductases                            |
| M11233           | Cathepsin D (lysosomal aspartyl protease) (CTSD)          | NC  | 3.2   | Proteolysis and peptidolysis                               |
| AF084558         | Fatty acid desaturase 1                                   | NC  | 3.1   | Regulate the unsaturation of fatty acids                   |
| AF151802         | CGI-44 protein; sulfide dehydrogenase-like (CGI-44)       | NC  | 3     | Electron transport                                         |
| NM_000285        | Peptidase D (PEPD)                                        | NC  | 2.9   | Collagen catabolism                                        |
| NM_000434        | Lysosomal sialidase                                       | NC  | 2.8   | Desialylation of sialoglycoconjugates                      |
| NM_017458        | Major vault protein (MVP), transcript variant 1           | NC  | 2.8   | Drug resistance                                            |
| NM_000954        | Prostaglandin D2 synthase (PTGDS)                         | NC  | 2.8   | Biosynthesis of PGD2                                       |
| NM_002340        | 2,3-Oxidosqualene-lanosterol cyclase                      | NC  | 2.7   | Cyclization of (S)-2,3 oxidosqualene to lanosterol         |
| NM_002004        | Farnesyl diphosphate synthase (FDPS)                      | NC  | 2.5   | Cholesterol biosynthesis                                   |
| NM_002496        | NADH dehydrogenase (ubiquinone) Fe-S protein 8            | NC  | 2.5   | Oxidative phosphorylation; NADH to ubiquinone              |
| NM_000543        | Acid sphingomyelinase (ASM)                               | NC  | 2.4   | Sphingomyelin metabolism                                   |
| NM_007014        | Nedd-4-like ubiquitin-protein ligase                      | NC  | 2.4   | Ubiquitin-protein ligase activity                          |
| AF073890         | Cathepsin X precursor                                     | NC  | 2.3   | Lysosomal protease                                         |
| NM_012320        | LCAT-like lysophospholipase                               | NC  | 2.3   | Lipid metabolism                                           |
| K02920           | Lysosomal glucocerebrosidase, glucosidase, beta; acid     | NC  | 2.3   | Sphingoglycolipid metabolism                               |
| NM_000713        | Biliverdin reductase B (BLVRB)                            | NC  | 2.2   | Heme metabolism                                            |
| NM_016256        | Phosphodiester alpha-GlcNAcase                            | NC  | 2.2   | Glucosamine metabolism                                     |
| NM_001064        | Transketolase (tk)                                        | NC  | 2.2   | Links pentose phosphate pathway with glycolytic pathway    |
| NM_012088        | 6-Phosphogluconolactonase (PGLS)                          | NC  | 2.1   | Pentose phosphate pathway of carbohydrate metabolism       |
| U02389           | hLON ATP-dependent protease, serine, 15 (PRSS15)          | NC  | 2.1   | ATP-dependent peptidase activity                           |
| NM_006702.1      | Neuropathy target esterase (NTE)                          | NC  | 2.1   | Neuronal development                                       |
| NM_016243        | Cytochrome b5 reductase 1 (B5R.1)                         | NC  | 2     | Electron transport                                         |
| U91316           | Cytosolic acyl coenzyme A thioester hydrolase (HBACH)     | NC  | 2     | Cleave fatty acyl-CoAs into free fatty acids and CoA       |
| NM_004110        | Ferredoxin reductase (FDXR) transcript variant 2          | NC  | 2     | Electron-transport chain of mitochondrial cytochromes P450 |
| U30894           | N-sulfoglucosamine sulfohydrolase                         | NC  | 2     | Glycosaminoglycan metabolism                               |
| AF126799         | Delta-6 fatty acid desaturase (FADS6)                     | NC  | 1.9   | Regulate unsaturation of fatty acids                       |
| NM_021727        | Fatty acid desaturase 3 (FADS3)                           | NC  | 1.9   | Regulate de novo unsaturation of fatty acids               |
| NM_005471        | Glucosamine-6-phosphate isomerase (GNPI)                  | NC  | 1.9   | Glucosamine catabolism                                     |
| NM_001276        | Glycoprotein chitinase 3-like 1                           | NC  | 1.9   | Deposition and remodelling of the cartilage matrix         |
| AA927724         | Adenine phosphoribosyltransferase                         | NC  | 1.8   | Nucleoside metabolism                                      |
| D83782           | SREBP cleavage-activating protein                         | NC  | 1.8   | Cholesterol homeostasis                                    |
| U90223           | dUTP pyrophosphatase (DUT)                                | NC  | 1.7   | dUTP metabolism                                            |
| J03934           | NAD(P)H dehydrogenase, quinone 1 (NQO1)                   | NC  | 1.7   | Xenobiotic metabolism                                      |
| NM_005525        | Hydroxysteroid (11-beta) dehydrogenase 1 (HSD11B1)        | NC  | -1.6  | Steroid metabolism                                         |
| BC003623         | Brain protein 14-3-3, zeta isoform (YWHAZ)                | NC  | -1.7  | Prostaglandin and leukotriene metabolism                   |
| NM_004784        | N-deacetylase N-sulfotransferase 3 (NDST3)                | NC  | -1.8  | Protein amino acid sulfation; deacetylation                |
| NM_016081        | Paladin                                                   | NC  | -1.8  | Organelle biogenesis                                       |
| BG290646         | Ubiquitin-conjugating enzyme E2N                          | NC  | -1.8  | Ubiquitin cycle                                            |

Table S1 Continued.

| Accession number | Gene title                                                    | 3 h  | 21 h  | Function                                              |
|------------------|---------------------------------------------------------------|------|-------|-------------------------------------------------------|
| U68758           | Pyrraline-5-carboxylate synthetase (PYCS)                     | NC   | -1.9  | Amino acid biosynthesis                               |
| NM_003349        | Ubiquitin-conjugating enzyme E2 variant 1                     | NC   | -1.9  | Protein polyubiquitination                            |
| A1687738         | Peptidylprolyl isomerase B (cyclophilin B)                    | NC   | -2.1  | Protein folding                                       |
| NM_002764        | Phosphoribosyl pyrophosphate synthetase 1 (PRPS1)             | NC   | -2.1  | Nucleoside metabolism and biosynthesis                |
| NM_006452        | Phosphoribosylaminoimidazole carboxylase (PAICS)              | NC   | -2.1  | Purine base biosynthesis                              |
| NM_002056        | Glutamine-fructose-6-phosphate transaminase 1 (GFPT1)         | NC   | -2.2  | Hexosamine biosynthetic pathway                       |
| AL049593         | Phospholipase C, beta 1 (PLCB1)                               | NC   | -2.2  | Lipid metabolism                                      |
| NM_006523        | X-prolyl aminopeptidase-like (XPPEPL)                         | NC   | -2.2  | Removes N-terminal amino acids adjacent to proline    |
| U10473           | Beta-1,4-galactosyltransferase 3 (B4GALT3)                    | NC   | -2.3  | Carbohydrate biosynthesis                             |
| NM_003299        | Tumour rejection antigen (gp96) 1                             | NC   | -2.3  | Elicits tumour-specific immunity                      |
| NM_004388        | Chitobiase, di-N-acetyl- (CTBS)                               | NC   | -2.4  | Carbohydrate metabolism                               |
| NM_012343        | Nicotinamide nucleotide transhydrogenase (NNT)                | NC   | -2.4  | Electron transport                                    |
| D38145           | Prostacyclin synthase                                         | NC   | -2.4  | Prostaglandin biosynthesis                            |
| M59979           | Prostaglandin-endoperoxide synthase 1 (PTGS1)                 | NC   | -2.4  | Prostaglandin biosynthesis                            |
| AF254621         | NADPH oxidase 4 (NOX4)                                        | NC   | -2.5  | Electron donor for superoxide production              |
| NM_003659        | Alkylglycerone phosphate synthase (AGPS)                      | NC   | -2.6  | Lipid biosynthesis                                    |
| U18197.1         | ATP citrate lyase (ACLY)                                      | NC   | -2.6  | Citrate metabolism                                    |
| BE568219         | Phosphodiesterase 8A                                          | NC   | -2.7  | Cyclic nucleotide metabolism                          |
| AF321182         | Protease, serine, 26 (PRSS22)                                 | NC   | -2.9  | Proteolysis and peptidolysis                          |
| D37931           | RNase A family, 4 (RNASE4)                                    | NC   | -2.9  | mRNA cleavage                                         |
| U65090           | Carboxypeptidase D (CPD)                                      | NC   | -3.1  | Proteolysis and peptidolysis                          |
| AF036144         | Meningioma expressed antigen 5 (MGEA5)                        | NC   | -3.1  | Glycoprotein catabolism                               |
| U28936           | 14-3-3 Protein epsilon isoform (YWHAE)                        | NC   | -3.3  | Binds cdk; intracellular signalling cascade           |
| NM_002318        | Lysyl oxidase-like 2                                          | NC   | -3.3  | Catalyzes cross-linking of collagens and elastin      |
| NM_002534        | 2,5-Oligoadenylate synthetase 1 (OAS1)                        | NC   | -3.   | Nucleic acid metabolism                               |
| NM_005328        | Hyaluronan synthase 2 (HAS2)                                  | NC   | -3.5  | Hyaluronic acid biosynthesis                          |
| BC001258         | N-acetylglucosamine-phosphate mutase                          | NC   | -3.7  | Glucosamine metabolism                                |
| BF979497         | Squalene epoxidase                                            | NC   | -3.9  | Sterol biosynthesis                                   |
| D85390           | gp180-carboxypeptidase D-like enzyme                          | NC   | -4    | Proteolysis and peptidolysis                          |
| NM_005907        | Mannosidase, alpha, class 1A, member 1 (MAN1A1)               | NC   | -4.8  | N-linked glycosylation                                |
| NM_002408        | 2-N-acetylglucosaminyltransferase (MGAT2)                     | NC   | -4.9  | Conversion of oligomannose to complex N-glycans       |
| BE503425         | Lysyl oxidase (LOX)                                           | NC   | -6    | Catalyses cross-linking of collagens and elastin      |
| AF027740         | Prostaglandin E synthase (PTGES)                              | NC   | -6.2  | Prostaglandin metabolism                              |
| NM_000041        | Apolipoprotein E                                              | NC   | -6.7  | Lipid metabolism                                      |
| AF288208         | Beta-1,3-N-acetylglucosaminyltransferase (BETA3GNT)           | NC   | -6.8  | Poly-N-acetylglucosamine biosynthesis                 |
| BE256969         | PAF acetylhydrolase, isoform Ib, alpha subunit                | NC   | -7.8  | Lipid metabolism                                      |
| AF191653         | Nucleoside diphosphate-linked moiety X-type motif 4 (NUDT4)   | NC   | -7.9  | Cyclic nucleotide metabolism                          |
| A1652662         | Branched-chain aminotransferase 1, cytosolic (BCAT1)          | NC   | -10.3 | Branched-chain family amino acid biosynthesis         |
| Transporter      |                                                               |      |       |                                                       |
| NM_000104        | Cytochrome P450, subfamily I polypeptide 1 (CYP1B1)           | 4.1  | NC    | Electron transport                                    |
| NM_003615        | Solute carrier family 4 member 7 (SLC4A7)                     | 3.2  | NC    | Coupled transport of sodium and bicarbonate ions      |
| NM_021187        | Cytochrome P450, subfamily IVF, polypeptide 11 (CYP4F11)      | 3.1  | NC    | Electron transport                                    |
| AB040875         | Solute carrier family 7, member 11 (SLC7A11)                  | 2.7  | NC    | Cationic amino acid transporter                       |
| AB018009         | L-type amino acid transporter 1                               | 2.2  | NC    | Import of large neutral amino acids                   |
| AF271070         | Amino acid transporter system A1 (ATA1)                       | 1.9  | NC    | Transport of amino acids and N-methylated amino acids |
| AV717561         | ATPase, H+ transporting, lysosomal subunit H (ATP6H)          | -2   | NC    | Translocates protons                                  |
| AF034102         | Solute carrier family 29, member 2 (SLC29A2)                  | -3.3 | NC    | Nucleoside transporter                                |
| NM_017585        | Solute carrier family 2 member 6 (SLC2A6)                     | NC   | 11.9  | Facilitates glucose transport                         |
| AF026030         | Mitochondrial inner membrane protein import receptor (hTIM44) | NC   | 10.1  | Import of mitochondrial proteins into mitochondria    |
| NM_002555        | Solute carrier family 22 member 1-like (SLC22A1L)             | NC   | 8.4   | Organic cation transporter                            |
| NM_006019        | T-cell, immune regulator 1 (TCIRG1)                           | NC   | 3.8   | Hydrogen-transporting ATPase activity                 |

Table S1 Continued.

| Accession number                  | Gene title                                                     | 3 h         | 21 h       | Function                                              |
|-----------------------------------|----------------------------------------------------------------|-------------|------------|-------------------------------------------------------|
| NM_003040                         | Solute carrier family 4, member 2 (SLC4A2)                     | NC          | <b>2.8</b> | Anion transport                                       |
| NM_030971                         | Tricarboxylate carrier-like protein (BA108L7.2)                | NC          | <b>2.3</b> | Cation and iron ion transport                         |
| Z67743                            | CLC-7 chloride channel protein                                 | NC          | <b>2.2</b> | Voltage gated chloride channel                        |
| BE798517                          | Mitochondrial ATP synthase delta subunit                       | NC          | <b>2.1</b> | Proton transporting ATP synthase complex              |
| NM_002394                         | Solute carrier family 3 member 2 (SLC3A2)                      | NC          | <b>2.1</b> | Dibasic and neutral amino acid transport              |
| BC001913                          | Vesicle amine transport protein 1 homologue (VAT1)             | NC          | 1.8        | Vesicular amine transport                             |
| NM_013272                         | Solute carrier family 21 member 11 (SLC21A11)                  | NC          | 1.7        | Organic anion transporter                             |
| M23114                            | Sarcoplasmic reticulum Ca(2+)-ATPase 2 (SERCA2)                | NC          | -1.5       | Cation transport across membranes                     |
| AF189723                          | Calcium transport ATPase (ATP2C1A)                             | NC          | -1.8       | Cation transport                                      |
| NM_001690                         | ATPase, H+ transporting lysosomal alpha polypeptide 1 (ATP6A1) | NC          | -2         | Proton transport                                      |
| NM_016657                         | KDEL ER protein retention receptor 3 (KDELR3)                  | NC          | -2         | Retention of resident proteins in ER                  |
| NM_003051                         | Solute carrier family 16 member 1 (SLC16A1)                    | NC          | -2         | Monocarboxylate transporter activity                  |
| AA805753                          | ATPase, Ca2+ transporting, cardiac muscle, slow twitch 2       | NC          | -2.2       | Cation transport                                      |
| NM_005765                         | ATPase, H+ transporting, lysosomal membrane protein M8-9       | NC          | -2.3       | Vacuolar proton pump                                  |
| NM_006801                         | KDEL ER protein retention receptor 1 (KDELR1)                  | NC          | -2.3       | Retention of resident proteins in ER                  |
| AJ002428                          | Voltage-dependent anion channel 1 (VDAC1)                      | NC          | -2.4       | Anion transport                                       |
| NM_006854                         | KDEL ER protein retention receptor 2 (KDELR2)                  | NC          | -2.6       | Retention of resident proteins in ER                  |
| NM_007107                         | Signal sequence receptor, gamma (SSR3)                         | NC          | -2.7       | Protein translocation across ER                       |
| NM_007325                         | Glutamate receptor 3 (GLUR3)                                   | NC          | -2.8       | Glutamate signalling; synaptic transmission           |
| AF053755                          | Bicarbonate transporter (BT)                                   | NC          | -3.4       | Small molecule transport                              |
| NM_004733                         | Acetyl-coenzyme A transporter (ACATN)                          | NC          | -3.5       | Acetyl-CoA transporter activity                       |
| NM_012450                         | Sulfate transporter 1 (SUT1)                                   | NC          | -3.8       | Sodium ion transport; sulfate transport               |
| AI638420                          | Chloride intracellular channel 4 (CLIC4)                       | NC          | -4.7       | Chloride transport                                    |
| <b>Cytokine and growth factor</b> |                                                                |             |            |                                                       |
| NM_002546                         | Osteoprotegerin (TNFRSF11B)                                    | <b>15.1</b> | NC         | Regulates bone resorption                             |
| NM_004591                         | Chemokine (cc motif) ligand 20 (CCL20)                         | <b>14.2</b> | NC         | Recruitment of activated T-cells                      |
| NM_012242                         | Dickkopf ( <i>Xenopus laevis</i> ) homologue 1 (DKK1)          | <b>13.8</b> | <b>3.8</b> | Growth factor                                         |
| NM_001945                         | Heparin-binding EGF-like growth factor                         | <b>7</b>    | -1.8       | Binds EGFR; positive regulation of cell proliferation |
| NM_000417                         | Interleukin 2 receptor, alpha (IL2RA)                          | <b>3.8</b>  | NC         | T-cell proliferation                                  |
| NM_002506                         | Nerve growth factor, beta (NGFB)                               | <b>2.8</b>  | 1.6        | Survival of nerve cells                               |
| NM_002607                         | Platelet-derived growth factor alpha (PDGFA)                   | <b>2.5</b>  | NC         | Cell proliferation                                    |
| NM_013246                         | Cardiotrophin-like cytokine (CLC)                              | <b>2</b>    | NC         | IL-6 family of cytokines                              |
| AF229253                          | FGF2-interacting factor (API5)                                 | -1.5        | -2.9       | Apoptosis inhibitor                                   |
| NM_002090                         | GRO3 oncogene (GRO3)                                           | -1.8        | NC         | G-protein-coupled receptor protein signalling pathway |
| S69738                            | Monocyte chemotactic protein human (MCP-1)                     | -1.8        | -2         | Recruitment of monocytes                              |
| AF125392                          | Insulin-induced protein 2                                      | -2          | -2.3       |                                                       |
| NM_006273                         | Chemokine (C-C motif) ligand 7 (CCL7)                          | -2          | -2.6       | Monocytes/macrophages recruitment                     |
| X16323                            | Hepatocyte growth factor (HGF)                                 | -2.3        | -4.1       | Cell proliferation                                    |
| M59465                            | TNF alpha-induced protein 3 (TNFAIP3)                          | -2.7        | -1.9       | Inhibits NFK-B and TNF-mediated apoptosis             |
| M57731                            | Gro-beta; GRO2 oncogene                                        | -3.1        | NC         | G-protein-coupled receptor protein signalling pathway |
| NM_000759                         | Colony-stimulating factor 3 (granulocyte) (CSF3)               | -5.8        | NC         | Positive regulation of cell proliferation             |
| NM_001492                         | Growth differentiation factor 1 (GDF1)                         | NC          | <b>8.5</b> | Growth factor                                         |
| AF028333                          | Growth differentiation factor-11 (GDF11)                       | NC          | <b>4.8</b> | Neurogenesis; skeletal development                    |
| NM_021805                         | Single Ig IL-1R-related molecule (SIGIRR)                      | NC          | <b>4.7</b> | Subtype of the IL-1R superfamily                      |
| NM_002010                         | Fibroblast growth factor 9 (FGF9)                              | NC          | <b>2.5</b> | Cell proliferation                                    |
| NM_000599                         | Insulin-like growth factor-binding protein 5 (IGFBP5)          | NC          | <b>2.1</b> | IGF binding; regulation of cell growth                |
| NM_003641                         | Interferon-induced transmembrane protein 1 (IFITM1)            | NC          | -1.3       | Antiproliferative                                     |
| NM_001709                         | Brain-derived neurotrophic factor (BDNF)                       | NC          | -1.4       | Survival of striatal neurons in the brain             |
| NM_006792                         | Mortality factor 4 (MORF4)                                     | NC          | -1.6       | Induces senescent-like phenotype in cell lines        |
| AK001280                          | Hepatoma-derived growth factor                                 | NC          | -1.7       | Growth factor                                         |
| NM_000600                         | Interleukin 6 (IL6)                                            | NC          | -2         | Acute-phase response; cell proliferation              |

Table S1 Continued.

| Accession number     | Gene title                                                   | 3 h  | 21 h  | Function                                                 |
|----------------------|--------------------------------------------------------------|------|-------|----------------------------------------------------------|
| AF214570             | Vascular endothelial growth factor (VEGF)                    | NC   | −2.4  | Positive regulation of cell proliferation; angiogenesis  |
| NM_000598            | Insulin-like growth factor-binding protein 3                 | NC   | −2.5  | Regulation of cell growth                                |
| U81380               | Interleukin-13 receptor soluble form                         | NC   | −2.6  | IL-13 regulation                                         |
| NM_002187            | Interleukin 12B (IL12B)                                      | NC   | −2.7  | Positive regulation of activated T-cell proliferation    |
| BC001281             | TNF receptor superfamily, member 10b                         | NC   | −2.8  | Induction of apoptosis via death domain receptors        |
| D78132               | Ras homologue-enriched in brain 2 (RHEB2)                    | NC   | −2.9  | Ras-related growth factor                                |
| U19495               | Intercrine-alpha stromal cell-derived factor 1               | NC   | −3.1  | regulation of actin polymerization; cell–cell signalling |
| AW770896             | Insulin-like growth factor-binding protein 7                 | NC   | −3.7  | Negative regulation of cell proliferation                |
| M19154               | Transforming growth factor, beta 2 (TGFB2)                   | NC   | −4    | Regulation of proliferation                              |
| NM_005711            | EGF-like repeats and discoidin I-like domains 3              | NC   | −5.3  | Integrin binding; cell adhesion                          |
| NM_000641            | Interleukin 11 (IL11)                                        | NC   | −6.4  | Positive regulation of cell proliferation                |
| BG166705             | Small inducible cytokine subfamily B (CXC), member 5 (SCYB5) | NC   | −8    | Chemotaxis; positive regulation of cell proliferation    |
| NM_000618            | Insulin-like growth factor I (somatomedin C)                 | NC   | −12.5 | RAS signal transduction; regulation of proliferation     |
| <b>Miscellaneous</b> |                                                              |      |       |                                                          |
| NM_017856            | Hypothetical protein FLJ20514                                | 9.3  | NC    |                                                          |
| AB007938             | KIAA0469                                                     | 7.5  | 6.7   |                                                          |
| NM_014344            | Putative-secreted ligand homologous to ftx1                  | 7    | 7.8   |                                                          |
| NM_018039            | Hypothetical gene FLJ10251                                   | 4.8  | NC    |                                                          |
| AK000293             | cDNA FLJ20286, clone HEP04358                                | 4.5  | NC    |                                                          |
| NM_020119            | Hypothetical gene FLB6421 (FLB6421)                          | 4.4  | NC    |                                                          |
| BE783668             | KIAA1032                                                     | 4.4  | NC    |                                                          |
| AB051442             | KIAA1655                                                     | 4.3  | NC    |                                                          |
| AL080112             | cDNA clone DKFZp586H0722                                     | 4.2  | NC    |                                                          |
| AF281064             | CHMP1.5 protein (CHMP1.5)                                    | 4    | NC    | Vesicle trafficking                                      |
| AF277094             | Stargardt disease 3 (autosomal dominant) (ELOVL4)            | 3.9  | NC    |                                                          |
| AL117523             | KIAA1053                                                     | 3.7  | NC    |                                                          |
| AK024259             | Highly similar to KIAA0998                                   | 3.5  | NC    |                                                          |
| AF070592             | HSKM-B                                                       | 3.4  | NC    |                                                          |
| AL137378             | cDNA from clone DKFZp434K1126                                | 3.3  | NC    |                                                          |
| U81031               | Cosmid 6E5 CDK4, SAS, KIAA0167 and OS9 genes                 | 3.1  | NC    |                                                          |
| NM_014114            | PRO0097 protein                                              | 3    | 6     |                                                          |
| AA488687             | est:ab38f03                                                  | 2.8  | NC    |                                                          |
| AB037745             | KIAA1324                                                     | 2.8  | NC    |                                                          |
| K01391               | <i>Bacillus subtilis</i> TrpE, D, C proteins in K01391       | 2.7  | NC    |                                                          |
| NM_024697            | Hypothetical protein FLJ22419                                | 2.7  | NC    |                                                          |
| AB028976             | KIAA1053                                                     | 2.7  | NC    |                                                          |
| N30649               | Truncated calcium-binding protein (LOC51149)                 | 2.7  | 8.4   |                                                          |
| AW503390             | Est weakly similar to ALU7_human ALU subfamily               | 2.6  | NC    |                                                          |
| X80821               | mRNA for ribosomal protein L18a homologue                    | 2.6  | NC    |                                                          |
| AI189753             | cDNA FLJ13302 clone OVARC1001357                             | 2.5  | NC    |                                                          |
| AW205215             | KIAA0286                                                     | 2.5  | NC    |                                                          |
| N30342               | KIAA0339                                                     | 2.5  | NC    |                                                          |
| AL353759             | Sequence from chr 6                                          | 2.5  | NC    |                                                          |
| NM_022454            | SRY-box-containing gene 17                                   | 2.4  | NC    |                                                          |
| NM_025025            | Hypothetical gene FLJ14100                                   | 2.2  | NC    |                                                          |
| NM_014705            | KIAA0716                                                     | 2.1  | NC    |                                                          |
| NM_014388            | Similar to YIL091C yeast hypothetical 84 kD protein          | 2.1  | NC    |                                                          |
| AL556438             | Clone CS0DK004Y118 (3 prime)                                 | 1.9  | NC    |                                                          |
| AA148507             | cDNA DKFZp564D016                                            | 1.8  | NC    |                                                          |
| AW779556             | KIAA0965                                                     | 1.8  | NC    |                                                          |
| NM_014575            | Schwannomin-interacting protein 1 (SCHIP-1)                  | 1.8  | NC    |                                                          |
| NM_030915            | Hypothetical gene DKFZp566J091                               | 1.6  | NC    |                                                          |
| NM_024116            | Hypothetical protein MGC5306                                 | 1.6  | NC    |                                                          |
| NM_018418            | Hypothetical protein (HSD-3.1)                               | −1.2 | NC    |                                                          |
| NM_014909            | KIAA1036 protein                                             | −1.5 | −1.8  |                                                          |
| AF199356             | F-box and leucine-rich repeat protein 7                      | −1.6 | NC    | Components of modular E3 ubiquitin protein ligases       |
| AL031848             | Sequence from clone 20208 on chromosome 1p36.11-36.31        | −1.6 | NC    |                                                          |
| AI078169             | FLJ23176 fis, clone LNG10452                                 | −1.7 | NC    |                                                          |

Table S1 Continued.

| Accession number | Gene title                                              | 3 h   | 21 h | Function                                                  |
|------------------|---------------------------------------------------------|-------|------|-----------------------------------------------------------|
| NM_003155        | Stanniocalcin 1                                         | -1.9  | NC   |                                                           |
| AF269167         | Arsenite-related gene 1                                 | -1.9  | -5.2 |                                                           |
| U85707           | MEIS1 homobox protein                                   | -2    | -2   | Specify cell fates and differentiation patterns           |
| AF268037         | Chromosome 8 open reading frame 4 (C8ORF4)              | -2.1  | -1.8 | Thyroid carcinogenesis                                    |
| AL049786         | Novel human gene mapping to chromosome 13               | -2.2  | NC   |                                                           |
| AB020721         | KIAA0914 gene product                                   | -2.3  | NC   |                                                           |
| NM_018678        | Lipopolysaccharide specific response-68 protein (LSR68) | -2.5  | -4.3 |                                                           |
| M58549           | Matrix Gla protein (MGP)                                | -2.8  | -2.3 | Regulator of Ca deposition in cartilage and arterial wall |
| NM_015626        | SOCS box-containing WD protein SWIP-1 (WSB1)            | -2.8  | -5.4 |                                                           |
| AW029169         | KIAA0507 protein                                        | -2.9  | NC   |                                                           |
| NM_025079        | Hypothetical protein FLJ23231                           | -3.1  | NC   |                                                           |
| AW195581         | KIAA0761 protein                                        | -3.1  | NC   |                                                           |
| BC000527         | Ewing sarcoma breakpoint region 1                       | -3.4  | NC   | Sarcoma-associated gene                                   |
| D17570           | Zona pellucida-binding protein (SP38)                   | -3.4  | NC   |                                                           |
| M10098           | AFFX-r2-Hs18SrRNA                                       | -3.7  | NC   |                                                           |
| D87470           | KIAA0280 gene                                           | -3.7  | NC   |                                                           |
| AF139463         | Early growth response 2 (EGR2)                          | -3.9  | NC   | Induction of genes critical for myelination               |
| NM_024111        | Hypothetical protein MGC4504                            | -3.9  | NC   |                                                           |
| AF144755         | Hypoxia-inducible protein 2 (HIG2)                      | -3.9  | NC   | Response to stress                                        |
| NM_030776        | Z DNA-binding protein 1 (ZBP1)                          | -4.3  | NC   | Binds left-handed Z-DNA                                   |
| AK023792         | Hypothetical protein FLJ13074                           | -4.5  | -3.1 |                                                           |
| AF056209         | PAM COOH-terminal interactor protein 1 (PCIP1)          | -4.9  | NC   | Neuropeptide signalling pathway                           |
| NM_000312        | Protein C (PROC)                                        | -5    | NC   | Anticoagulant                                             |
| NM_017606        | Hypothetical protein DKFZp434K1210                      | -5.3  | NC   |                                                           |
| M12529           | Apolipoprotein E (APOE)                                 | -5.5  | -6.2 | Lipid metabolism and transport                            |
| NM_017869        | BTG3-associated nuclear protein (BANP)                  | -9.8  | NC   |                                                           |
| NM_019058        | Hypothetical protein (FLJ20500)                         | -9.8  | NC   |                                                           |
| AF263928         | Papillomavirus regulatory factor PRF-1 (LOC55893)       | -19.7 | NC   |                                                           |
| AC005943         | Chromosome 19, cosmid R30538                            | NC    | 24.3 |                                                           |
| BE885926         | KIAA0706                                                | NC    | 17.1 |                                                           |
| NM_022772        | Hypothetical gene FLJ21935                              | NC    | 15.4 |                                                           |
| NM_024874        | Hypothetical protein FLJ14225                           | NC    | 14.7 |                                                           |
| NM_014786        | KIAA0337                                                | NC    | 11.7 |                                                           |
| BE305165         | Phospholipase C, beta 3, neighbour pseudogene           | NC    | 9.5  |                                                           |
| BG334196         | FLJ00043 protein                                        | NC    | 8    |                                                           |
| NM_024801        | Hypothetical protein FLJ21551                           | NC    | 8    |                                                           |
| NM_017722        | Hypothetical protein FLJ20244                           | NC    | 7.8  |                                                           |
| NM_018052        | Hypothetical gene FLJ10305                              | NC    | 7.3  |                                                           |
| NM_022914        | Hypothetical protein 24432                              | NC    | 7.2  |                                                           |
| AF043898         | Bridging integrator 1                                   | NC    | 7    | Synaptic transmission; non-selective vesicle transport    |
| AB028949         | KIAA1026 protein                                        | NC    | 6.6  |                                                           |
| NM_017949        | Hypothetical protein FLJ20739                           | NC    | 6.4  |                                                           |
| U79266           | Clone 23627 (HSU79266)                                  | NC    | 6.2  |                                                           |
| NM_024922        | Hypothetical protein FLJ21736                           | NC    | 5.8  |                                                           |
| NM_017707        | Hypothetical protein FLJ20199                           | NC    | 5.5  |                                                           |
| AB011133         | KIAA0561 protein                                        | NC    | 5.5  |                                                           |
| X83412           | B1 mucin                                                | NC    | 5.2  |                                                           |
| NM_024906        | Hypothetical protein FLJ21032                           | NC    | 5    |                                                           |
| AB002354         | KIAA0356 protein                                        | NC    | 5    |                                                           |
| AI935123         | est:wp13h09.x1                                          | NC    | 4.9  |                                                           |
| BF062629         | DKFZP586E1621                                           | NC    | 4.8  |                                                           |
| NM_022372        | G-protein beta subunit-like (GBL)                       | NC    | 4.8  |                                                           |
| AF007155         | Clone 23763 unknown mRNA                                | NC    | 4.5  |                                                           |
| NM_017600        | Hypothetical protein DKFZp434M0331                      | NC    | 4.2  |                                                           |
| NM_021995        | Urotensin 2 (UTS2), transcript variant 1                | NC    | 4.2  | Vasoconstrictor                                           |
| NM_017849        | Hypothetical protein FLJ20507                           | NC    | 4.1  |                                                           |
| AW070431         | Myelin basic protein                                    | NC    | 4    | Nerve ensheathment                                        |
| BC000039         | Similar to hypothetical protein, clone MGC:1824         | NC    | 3.9  |                                                           |
| AL540260         | PAC clone RP3-515N1 from 22q11.2-q22                    | NC    | 3.8  |                                                           |
| NM_024509        | Hypothetical protein MGC2656                            | NC    | 3.6  |                                                           |
| AU155105         | FLJ13271 fis, clone OVARC1001000                        | NC    | 3.5  |                                                           |

Table S1 Continued.

| Accession number | Gene title                                             | 3 h | 21 h | Function                            |
|------------------|--------------------------------------------------------|-----|------|-------------------------------------|
| AV705559         | Lipin 1                                                | NC  | 3.5  | Adipocyte differentiation           |
| L77566           | DGS-1                                                  | NC  | 3.4  | Required for thymic development     |
| AK022897         | cDNA FLJ12835 fis, clone NT2RP2003165                  | NC  | 3.3  |                                     |
| NM_016473        | Hypothetical protein (LOC51243)                        | NC  | 3.3  |                                     |
| AW006750         | Hypothetical protein FLJ20059                          | NC  | 3.3  |                                     |
| AA907940         | 3 end/clone                                            | NC  | 3.2  |                                     |
| AA314406         | 5 end/clone                                            | NC  | 3.1  |                                     |
| NM_024632        | Hypothetical protein FLJ11526                          | NC  | 3.1  |                                     |
| NM_022842        | Hypothetical protein FLJ22969                          | NC  | 3.1  |                                     |
| AI341234         | 3 End                                                  | NC  | 3    |                                     |
| NM_025092        | Hypothetical protein FLJ22635                          | NC  | 2.9  |                                     |
| AW168132         | KIAA0404 protein                                       | NC  | 2.8  |                                     |
| AA149545         | 5 End/clone                                            | NC  | 2.6  |                                     |
| NM_017828        | Hypothetical protein FLJ20452                          | NC  | 2.6  |                                     |
| NM_030575        | Hypothetical protein MGC10334                          | NC  | 2.6  |                                     |
| BC001393         | Hypothetical protein, clone MGC:782                    | NC  | 2.6  |                                     |
| BC003654         | Similar to hypothetical protein MGC4365                | NC  | 2.6  |                                     |
| AF230924         | Divalent cation tolerant protein CUTA                  | NC  | 2.5  |                                     |
| BF038366         | Hypothetical protein                                   | NC  | 2.5  |                                     |
| NM_024952        | Hypothetical protein FLJ20950                          | NC  | 2.5  |                                     |
| NM_024900        | Hypothetical protein FLJ22479                          | NC  | 2.5  |                                     |
| AL040896         | Hypothetical protein MGC3035                           | NC  | 2.5  |                                     |
| AB007895         | KIAA0435 mRNA                                          | NC  | 2.5  |                                     |
| AB018333         | KIAA0790 protein                                       | NC  | 2.5  |                                     |
| AK022632         | cDNA FLJ12570 fis, clone NT2RM4000895                  | NC  | 2.4  |                                     |
| NM_006589        | Chromosome 1 open reading frame 2 (C1ORF2)             | NC  | 2.4  |                                     |
| AL049261         | DKFZp564E053 (from clone DKFZp564E053)                 | NC  | 2.3  |                                     |
| NM_022450        | Epidermal growth factor receptor-related protein       | NC  | 2.3  |                                     |
| BF038366         | Hypothetical protein                                   | NC  | 2.3  |                                     |
| NM_024682        | Hypothetical protein FLJ12168                          | NC  | 2.3  |                                     |
| NM_022759        | Hypothetical protein FLJ21865                          | NC  | 2.3  |                                     |
| R39094           | KIAA1085 protein                                       | NC  | 2.3  |                                     |
| AI493119         | 3 end/clone                                            | NC  | 2.2  |                                     |
| AF132940         | CGI-06 protein (LOC51604)                              | NC  | 2.2  |                                     |
| NM_020989        | Crystallin, gamma C (CRYGC)                            | NC  | 2.2  | Structural constituent of eye lens  |
| NM_022464        | ER chaperone SIL1, homolog of yeast (SIL1)             | NC  | 2.2  |                                     |
| NM_018103        | Hypothetical protein FLJ10470                          | NC  | 2.2  |                                     |
| BC001471         | Hypothetical protein FLJ20277                          | NC  | 2.2  |                                     |
| NM_017966        | Hypothetical protein FLJ20847                          | NC  | 2.2  |                                     |
| AL040896         | Hypothetical protein MGC3035                           | NC  | 2.2  |                                     |
| NM_003900        | Sequestosome 1 (SQSTM1)                                | NC  | 2.2  |                                     |
| AA150503         | 3 End/clone                                            | NC  | 2.1  |                                     |
| AL571362         | Calcium-binding protein Cab45 precursor                | NC  | 2.1  | Calcium ion-binding activity        |
| AL136663         | cDNA DKFZp564A176 hypothetical protein                 | NC  | 2.1  |                                     |
| AI871641         | cDNA FLJ12012 fis, clone HEMBB1001668                  | NC  | 2.1  |                                     |
| BE783279         | est:601470835F1                                        | NC  | 2.1  |                                     |
| AK022192         | FLJ12130 fis, clone MAMMA1000251                       | NC  | 2.1  |                                     |
| AK000754         | Highly similar to J03068 Human DNF1552                 | NC  | 2.1  |                                     |
| NM_025099        | Hypothetical protein FLJ22170                          | NC  | 2.1  |                                     |
| AY007098         | Hypothetical protein FLJ22405                          | NC  | 2.1  |                                     |
| BC004998         | Membrane-bound C2 domain-containing protein (MBC2)     | NC  | 2.1  |                                     |
| AW016304         | 3 End/clone                                            | NC  | 2    |                                     |
| BG287862         | AHNAK nucleoprotein (desmoyokin)                       | NC  | 2    | Binds and activated PLC gamma       |
| AL136658         | Hypothetical protein chromosome 14 ORF 1               | NC  | 2    |                                     |
| NM_018391        | Hypothetical protein FLJ11328                          | NC  | 2    |                                     |
| NM_024779        | Hypothetical protein FLJ22055                          | NC  | 2    |                                     |
| AA775681         | Hypothetical protein FLJ23091                          | NC  | 2    |                                     |
| NM_006394        | Regulated in glioma (RIG)                              | NC  | 2    |                                     |
| AA631254         | 3 End/clone                                            | NC  | 1.9  |                                     |
| AI669655         | 3 End/clone                                            | NC  | 1.9  |                                     |
| NM_000489        | Alpha thalassaemia mental retardation syndrome (RAD54) | NC  | 1.9  |                                     |
| NM_019088        | Hypothetical protein F23149_1                          | NC  | 1.9  |                                     |
| NM_022827        | Hypothetical protein FLJ21347                          | NC  | 1.9  |                                     |
| NM_031213        | Hypothetical protein MGC:5244                          | NC  | 1.9  |                                     |
| NM_018584        | Hypothetical protein PRO1489                           | NC  | 1.9  |                                     |
| AF208043         | IFI16b                                                 | NC  | 1.9  | Interferon, gamma-inducible protein |
| AI735639         | KIAA0239 protein                                       | NC  | 1.9  |                                     |
| AL080183         | KIAA0592 protein                                       | NC  | 1.9  |                                     |
| AB014564         | KIAA0664 protein                                       | NC  | 1.9  |                                     |
| AB028988         | KIAA1065 protein                                       | NC  | 1.9  |                                     |

Table S1 Continued.

| Accession number | Gene title                                                     | 3 h | 21 h | Function                               |
|------------------|----------------------------------------------------------------|-----|------|----------------------------------------|
| D28124           | mRNA for unknown product                                       | NC  | 1.9  |                                        |
| BC001308         | Nucleolar protein ANKT                                         | NC  | 1.9  |                                        |
| NM_012436        | Sperm-associated antigen 8 (SPAG8)                             | NC  | 1.9  |                                        |
| BC004327         | Unknown (protein for IMAGE:3629896)                            | NC  | 1.9  |                                        |
| BF663461         | Clone PP1744 unknown mRNA                                      | NC  | 1.8  |                                        |
| AW241752         | FLJ11680 fis, clone HEMBA1004820                               | NC  | 1.8  |                                        |
| NM_024537        | Hypothetical protein FLJ12118                                  | NC  | 1.8  |                                        |
| NM_024958        | Hypothetical protein FLJ23329                                  | NC  | 1.8  |                                        |
| AB011174         | KIAA0602 protein                                               | NC  | 1.8  |                                        |
| AK025608         | KIAA0930 protein                                               | NC  | 1.8  |                                        |
| AI693193         | Metaxin 1                                                      | NC  | 1.8  |                                        |
| NM_000308        | Protective protein for beta-galactosidase (PPGB)               | NC  | 1.8  | Intracellular protein transport        |
| AA582932         | 3 End/clone                                                    | NC  | 1.7  |                                        |
| AL120741         | 5 End/clone                                                    | NC  | 1.7  |                                        |
| NM_016274        | CK2-interacting protein 1; HQ0024c protein (LOC51177)          | NC  | 1.7  |                                        |
| BC000464         | JM5 protein, clone MGC:8542                                    | NC  | 1.7  |                                        |
| AC005600         | Chromosome 16, P1 clone 109-9G (LANL)                          | NC  | 1.6  |                                        |
| AF132959         | CGI-25 protein (LOC51070)                                      | NC  | 1.5  |                                        |
| NM_014924        | KIAA0831 protein                                               | NC  | 1.4  |                                        |
| D13634           | KIAA0009 gene product                                          | NC  | -1.1 |                                        |
| AK024279         | FLJ14217 fis, clone NT2RP3003680                               | NC  | -1.2 |                                        |
| NM_024852        | Hypothetical protein FLJ12765                                  | NC  | -1.5 |                                        |
| BC001759         | Hypothetical protein FLJ20360                                  | NC  | -1.5 |                                        |
| AI760249         | KIAA1040 protein                                               | NC  | -1.5 |                                        |
| AI753659         | cDNA DKFZp56402363                                             | NC  | -1.6 |                                        |
| AI566082         | Clone 24889 mRNA sequence                                      | NC  | -1.6 |                                        |
| NM_018834        | Matrin 3                                                       | NC  | -1.6 |                                        |
| AF062483         | SDP3                                                           | NC  | -1.6 |                                        |
| BE748698         | Small acidic protein                                           | NC  | -1.6 |                                        |
| AF033095         | Testis enhanced gene transcript protein (TEGT)                 | NC  | -1.6 | Suppress apoptosis                     |
| AF201949         | 60S ribosomal protein L30 isologue (LOC51187)                  | NC  | -1.7 | Protein biosynthesis                   |
| AF214737         | C9orf10 protein                                                | NC  | -1.7 |                                        |
| AF151853         | CGI-95 protein                                                 | NC  | -1.7 |                                        |
| NM_001755        | Core-binding factor, beta subunit (CBFB), transcript variant 2 | NC  | -1.7 | Transcription from Pol II promoter     |
| AL110243         | Hypothetical protein DKFZP564A122 protein                      | NC  | -1.7 |                                        |
| NM_030938        | Hypothetical protein DKFZp566I133                              | NC  | -1.7 |                                        |
| NM_018212        | Hypothetical protein FLJ10773                                  | NC  | -1.7 |                                        |
| D14658           | KIAA0102 gene product                                          | NC  | -1.7 |                                        |
| AB011084         | KIAA0512 gene product                                          | NC  | -1.7 |                                        |
| AB014580         | KIAA0680 gene product                                          | NC  | -1.7 |                                        |
| AB023187         | KIAA0970 protein                                               | NC  | -1.7 |                                        |
| M30938           | Ku autoimmune antigen gene                                     | NC  | -1.7 | Ku autoimmune antigen gene             |
| BC002379         | MAD homologue 4 (MADH4)                                        | NC  | -1.7 | Putative tumour suppressor             |
| BE880828         | Transposon-like element mRNA                                   | NC  | -1.7 |                                        |
| NM_001839        | Calponin 3, acidic (CNN3)                                      | NC  | -1.8 | Smooth muscle contraction              |
| BG168666         | DKFZp434J1813 protein                                          | NC  | -1.8 |                                        |
| NM_006486        | Fibulin 1 (FBLN1), transcript variant D                        | NC  | -1.8 | Extracellular matrix glycoprotein      |
| NM_006329        | Fibulin 5 (FBLN5)                                              | NC  | -1.8 | Cell-matrix adhesion                   |
| AK025862         | FLJ22209 fis, clone HRC01496                                   | NC  | -1.8 |                                        |
| U25165           | Fragile X mental retardation, autosomal homologue 1            | NC  | -1.8 | Nucleic acid-binding activity          |
| NM_018422        | Hypothetical protein DKFZp761K1423                             | NC  | -1.8 |                                        |
| NM_018247        | Hypothetical protein FLJ10856                                  | NC  | -1.8 |                                        |
| NM_021175        | Liver-expressed antimicrobial peptide (LEAP-1)                 | NC  | -1.8 | Xenobiotic metabolism; immune response |
| BC002364         | Non-POU-domain-containing, octomer-binding                     | NC  | -1.8 | mRNA splicing                          |
| S81916           | Phosphoglycerate kinase (alternatively spliced)                | NC  | -1.8 |                                        |
| AF306510         | RAN-binding protein 9 (RANBP9)                                 | NC  | -1.8 | Protein complex assembly               |
| M11433           | Retinol-binding protein 1, cellular (RBP1)                     | NC  | -1.8 | Intracellular carrier of retinol       |
| NM_000993        | Ribosomal protein L31                                          | NC  | -1.8 |                                        |
| NM_005885        | Similar to <i>Saccharomyces cerevisiae</i> SSM4                | NC  | -1.8 |                                        |
| AF182292         | Sm protein F (LSM6)                                            | NC  | -1.8 | mRNA splicing                          |
| U51678           | Small acidic protein (IMAGE145052)                             | NC  | -1.8 |                                        |
| U09087           | Thymopoietin                                                   | NC  | -1.8 | Lamin binding                          |
| AF045606         | Chromosome 21 open reading frame 4 (C21ORF4)                   | NC  | -1.9 |                                        |
| AI718937         | Clone 24775                                                    | NC  | -1.9 |                                        |
| AF138300         | Decorin (DCN)                                                  | NC  | -1.9 | Histogenesis and organogenesis         |
| BC005291         | Eukaryotic translation elongation factor 1 epsilon 1 (EEF1E1)  | NC  | -1.9 | Protein biosynthesis                   |



Table S1 Continued.

| Accession number | Gene title                                                            | 3 h | 21 h | Function                                                  |
|------------------|-----------------------------------------------------------------------|-----|------|-----------------------------------------------------------|
| NM_017992        | Hypothetical protein FLJ10083                                         | NC  | -1.9 |                                                           |
| AL050262         | Hypothetical protein toll-like receptor 1                             | NC  | -1.9 | Host response against pathogens                           |
| AU153138         | KIAA0033 protein                                                      | NC  | -1.9 |                                                           |
| D80006           | KIAA0184 gene                                                         | NC  | -1.9 |                                                           |
| AV725328         | Prion protein                                                         | NC  | -1.9 | Protein infectious agent                                  |
| BC004892         | Reticulocalbin 2, EF-hand calcium-binding domain                      | NC  | -1.9 | Protein binding; calcium ion-binding; tumour suppressor   |
| AA890010         | SEC22, vesicle trafficking protein ( <i>S. cerevisiae</i> )-like 1    | NC  | -1.9 | ER to Golgi transport                                     |
| AI768845         | Synaptophysin-like protein                                            | NC  | -1.9 | Synaptic transmission                                     |
| AK025637         | Brefeldin A-inhibited guanine nucleotide-exchange protein 1           | NC  | -2   | Guanyl-nucleotide exchange factor activity                |
| AF104857         | Cdc42 effector protein 3                                              | NC  | -2   | Signal transduction; regulatory protein binding           |
| BG286537         | CGI-109 protein                                                       | NC  | -2   |                                                           |
| AF151899         | CGI-141 protein (LOC51026)                                            | NC  | -2   | Vesicle-mediated transport                                |
| AF080579         | Integral membrane subunit of complex II (CII-3) pseudogene            | NC  | -2   |                                                           |
| BC004467         | KIAA0171 gene product, clone MGC:10257                                | NC  | -2   |                                                           |
| AB007898         | KIAA0438 gene product                                                 | NC  | -2   |                                                           |
| AI479175         | KIAA1077 protein                                                      | NC  | -2   |                                                           |
| AF063002         | LIM protein SLIMMER                                                   | NC  | -2   | Cell growth; muscle development; cell differentiation     |
| AI653730         | Matrix Gla protein                                                    | NC  | -2   |                                                           |
| AF261717         | SAR1 protein (SAR1)                                                   | NC  | -2   | Interacts with components of the cytoskeleton             |
| NM_007281        | Scrapie-responsive protein 1 (SCRG1)                                  | NC  | -2   | Neurogenesis                                              |
| AF130464         | SEC24 ( <i>S. cerevisiae</i> )-related gene family, member D (SEC24D) | NC  | -2   |                                                           |
| AF065485         | Sorting nexin 4 (SNX4)                                                | NC  | -2   | Intracellular trafficking of proteins                     |
| AF030162         | Translocase of mitochondrial membrane 23 homologue (TIM23)            | NC  | -2   | Protein targeting; mitochondrial translocation            |
| NM_001177        | ADP-ribosylation factor-like 1 (ARL1)                                 | NC  | -2.1 | Intracellular vesicular membrane trafficking              |
| BC000373         | Amyloid beta (A4) precursor-like protein 2                            | NC  | -2.1 |                                                           |
| NM_014034        | Anti-silencing function 1 homologue A (ASF1A)                         | NC  | -2.1 |                                                           |
| NM_001746        | Calnexin                                                              | NC  | -2.1 | Protein secretion                                         |
| AI741876         | cDNA DKFZp566B213                                                     | NC  | -2.1 |                                                           |
| BC000899         | Golgi vesicular membrane trafficking protein p18, clone               | NC  | -2.1 | ER to Golgi protein transport                             |
| AI912583         | HIV-1 rev-binding protein 2                                           | NC  | -2.1 |                                                           |
| NM_017905        | Hypothetical protein FLJ20623                                         | NC  | -2.1 |                                                           |
| NM_018507        | Hypothetical protein PRO1843                                          | NC  | -2.1 |                                                           |
| AF282626         | Latexin protein (LXN)                                                 | NC  | -2.1 |                                                           |
| NM_005899        | Membrane component, chr. 17, surface marker 2                         | NC  | -2.1 | Tumour antigen                                            |
| D42063           | RAN-binding protein 2                                                 | NC  | -2.1 | Protein-nucleus import; protein folding                   |
| AF109873         | Retinoblastoma protein-associated protein                             | NC  | -2.1 |                                                           |
| AF085481         | Serum deprivation response (phosphatidylserine-BP) (SDPR)             | NC  | -2.1 | Phospholipid binding                                      |
| NM_005637        | Synovial sarcoma, translocated to X chromosome                        | NC  | -2.1 |                                                           |
| AF124489         | Arfaptin-1b mRNA, alternatively spliced                               | NC  | -2.2 | Vesicle transport between ER and Golgi complex            |
| M64110           | Caldesmon 1 (CALD1)                                                   | NC  | -2.2 | Muscle development; muscle contraction                    |
| BC002500         | Calreticulin (CALR)                                                   | NC  | -2.2 | Regulation of transcription, DNA-dependent                |
| AL133102         | CGI-142                                                               | NC  | -2.2 |                                                           |
| M97501           | Cytoplasmic linker protein-170 alpha-2 (CLIP-170)                     | NC  | -2.2 |                                                           |
| U13896           | Discs, large ( <i>Drosophila</i> ) homologue 1 (DLG1)                 | NC  | -2.2 |                                                           |
| AL049943         | DKFZp564F0522                                                         | NC  | -2.2 |                                                           |
| AF220153         | Four and a half LIM domains 1 protein isoform C (FHL1)                | NC  | -2.2 | Cell growth; muscle development; cell differentiation     |
| U16307           | Glioma pathogenesis-related protein (RTVP1)                           | NC  | -2.2 | Act enzymatically to inhibit microbial or viral infection |
| NM_015383        | Hypothetical protein DJ328E19.C1.1                                    | NC  | -2.2 |                                                           |
| AB044343         | KIAA0260 protein                                                      | NC  | -2.2 |                                                           |
| AI656706         | KIAA0997 protein                                                      | NC  | -2.2 |                                                           |
| AF095727         | Myelin protein zero-like protein MPZL1a                               | NC  | -2.2 | Protein tyrosine kinase signalling                        |

Table S1 Continued.

| Accession number | Gene title                                                   | 3 h | 21 h | Function                                            |
|------------------|--------------------------------------------------------------|-----|------|-----------------------------------------------------|
| NM_004641        | Myeloid/lymphoid or mixed-lineage leukaemia homologue (AF10) | NC  | -2.2 | Regulation of transcription, DNA-dependent          |
| NM_015640        | PAI-1 mRNA-binding protein (PAI-RBP1)                        | NC  | -2.2 |                                                     |
| D88674           | Antizyme inhibitor (LOC51582)                                | NC  | -2.3 | Polyamine biosynthesis                              |
| AF132941         | CGI-07 protein (LOC51068)                                    | NC  | -2.3 | Electron transport                                  |
| AF151834         | CGI-76 protein                                               | NC  | -2.3 |                                                     |
| AF003114         | CYR61;cysteine-rich, angiogenic inducer, 61                  | NC  | -2.3 | Embryogenesis and morphogenesis; cell proliferation |
| AK027217         | FLJ23564 fis, clone LNG10773                                 | NC  | -2.3 |                                                     |
| AF164622         | Golgin-67 (GOLGA5)                                           | NC  | -2.3 |                                                     |
| NM_015684        | Hypothetical protein HSU79253                                | NC  | -2.3 |                                                     |
| AL137254         | KIAA1109 protein                                             | NC  | -2.3 |                                                     |
| U41060           | LIV-1 protein, oestrogen regulated (LIV-1)                   | NC  | -2.3 | Metal ion transport                                 |
| U28727           | Pregnancy-associated plasma protein A                        | NC  | -2.3 | Pregnancy                                           |
| J03223           | Secretory granule proteoglycan peptide core mRNA             | NC  | -2.3 | Proteoglycan                                        |
| NM_003276        | Thymopoietin                                                 | NC  | -2.3 | Thymus development                                  |
| U19878           | TM protein with EGF and follistatin-like domains 1 (TMEFF1)  | NC  | -2.3 |                                                     |
| AI400621         | 3 End/clone                                                  | NC  | -2.4 |                                                     |
| AF353990         | Beta-amyloid-binding protein precursor (BBP)                 | NC  | -2.4 |                                                     |
| AA156865         | cDNA DKFZp56400122                                           | NC  | -2.4 |                                                     |
| AF151842         | CGI-84 protein                                               | NC  | -2.4 |                                                     |
| NM_003676        | Degenerative spermatocyte (lipid desaturase) (DEGS)          | NC  | -2.4 | Fatty acid desaturation                             |
| AF161392         | HSPC274 protein                                              | NC  | -2.4 |                                                     |
| NM_022826        | Hypothetical protein DKFZp586F1122 similar to axotrophin     | NC  | -2.4 |                                                     |
| NM_024753        | Hypothetical protein FLJ11457                                | NC  | -2.4 |                                                     |
| NM_025191        | Hypothetical protein FLJ13033                                | NC  | -2.4 |                                                     |
| AL096712         | Hypothetical protein FLJ20337                                | NC  | -2.4 |                                                     |
| NM_014774        | KIAA0494 protein                                             | NC  | -2.4 |                                                     |
| AW043713         | KIAA1077 protein                                             | NC  | -2.4 |                                                     |
| NM_002389        | Membrane cofactor protein (CD46) (MCP)                       | NC  | -2.4 | Invasive growth; virulence; complement activation   |
| AB000220         | Semaphorin 3C (SEMA3C)                                       | NC  | -2.4 | Non-multidrug resistance                            |
| NM_005637        | Synovial sarcoma, translocated to X chromosome (SSXT)        | NC  | -2.4 | Cell growth and/or maintenance                      |
| NM_017813        | Hypothetical protein FLJ20421                                | NC  | -2.5 |                                                     |
| NM_014789        | KIAA0628 gene product                                        | NC  | -2.5 |                                                     |
| D90453           | Caldesmon 1                                                  | NC  | -2.5 |                                                     |
| U95822           | Putative transmembrane GTPase                                | NC  | -2.5 |                                                     |
| NM_007190        | Sec23-interacting protein p125                               | NC  | -2.5 | Intracellular protein transport                     |
| NM_006948        | Stress 70 protein chaperone, microsome-associated (STCH)     | NC  | -2.5 | ATP binding                                         |
| R94644           | Versican Vint isoform                                        | NC  | -2.5 | Complex with matrix glycoproteins                   |
| AF013759         | Calumenin                                                    | NC  | -2.6 | Calcium ion binding                                 |
| AI057093         | cDNA DKFZp434I0812                                           | NC  | -2.6 |                                                     |
| AF151867         | CGI-109 protein                                              | NC  | -2.6 |                                                     |
| NM_001968        | Eukaryotic translation initiation factor 4E                  | NC  | -2.6 | Translational initiation; binding to mRNA cap       |
| AI936769         | FK506-binding protein 1A (12kD)                              | NC  | -2.6 | Protein folding                                     |
| NM_024862        | Hypothetical protein FLJ13962                                | NC  | -2.6 |                                                     |
| AB028991         | KIAA1068 protein                                             | NC  | -2.6 |                                                     |
| M30269           | Nidogen (enactin) (NID)                                      | NC  | -2.6 | Cell-matrix adhesion                                |
| D32039           | pgH3 mRNA for proteoglycan PG-M(V3)                          | NC  | -2.6 | Cell recognition                                    |
| AF113132         | Phosphoserine aminotransferase (PSA)                         | NC  | -2.6 | Metabolism                                          |
| AF239756         | PZR1b                                                        | NC  | -2.6 |                                                     |
| NM_030791        | Sphingosine-1-phosphatase (SGPP1)                            | NC  | -2.6 |                                                     |
| NM_019063        | Chromosome 2 open reading frame 2 (C2ORF2)                   | NC  | -2.7 |                                                     |
| AF257659         | Crocalbin-like protein                                       | NC  | -2.7 |                                                     |
| AL534321         | DAZ-associated protein 2                                     | NC  | -2.7 | Transport                                           |
| BC000793         | Eukaryotic translation initiation factor 1A                  | NC  | -2.7 | Translational initiation                            |
| AK021640         | FLJ11578 fis, clone HEMBA1003571                             | NC  | -2.7 |                                                     |
| AF197137         | FN5 protein (FN5)                                            | NC  | -2.7 |                                                     |
| AF064826         | Glypican 4 (GPC4)                                            | NC  | -2.7 | Anti-angiogenic                                     |
| AB029156         | HRP-3                                                        | NC  | -2.7 |                                                     |
| NM_024563        | Hypothetical protein FLJ14054                                | NC  | -2.7 |                                                     |
| NM_014739        | KIAA0164 gene product                                        | NC  | -2.7 |                                                     |
| AF069072         | KIAA0987                                                     | NC  | -2.7 | Actin binding                                       |
| AF136975         | Ribosome-associated membrane protein 4                       | NC  | -2.7 |                                                     |

Table S1 Continued.

| Accession number | Gene title                                                   | 3 h | 21 h | Function                                                   |
|------------------|--------------------------------------------------------------|-----|------|------------------------------------------------------------|
| AF106622         | Translocase of mitochondrial membrane 17 homologue A         | NC  | -2.7 | Protein targeting to mitochondria                          |
| AB028639         | Calpain 7 (CAPN7)                                            | NC  | -2.8 | Proteolysis and peptidolysis                               |
| AF016005         | Chromosome 1 atrophin-1-related protein (DRPLA)              | NC  | -2.8 |                                                            |
| BC005147         | FK506-binding protein 1A (12kD), clone MGC:2167              | NC  | -2.8 | Protein folding                                            |
| AK025843         | FLJ22190 fis, clone HRC01053                                 | NC  | -2.8 |                                                            |
| AB017365         | Frizzled ( <i>Drosophila</i> ) homologue 7 (FZD7)            | NC  | -2.8 | Frizzled receptor signalling pathway                       |
| AW138594         | Hypothetical protein FLJ10262                                | NC  | -2.8 |                                                            |
| AF119855         | Hypothetical protein PR01847                                 | NC  | -2.8 |                                                            |
| AF329637         | Mitofusin 1                                                  | NC  | -2.8 |                                                            |
| M35999           | Platelet glycoprotein IIIa (GPIIIa)                          | NC  | -2.8 | Platelet aggregation                                       |
| BC005253         | Similar to Kelch motif-containing protein, clone MGC:12288   | NC  | -2.8 | Cytoskeleton organization and biogenesis                   |
| BF695847         | YDD19 protein                                                | NC  | -2.8 |                                                            |
| NM_002964        | Calgranulin A (CGLA)                                         | NC  | -2.9 | Ca- and Zn-binding protein; Cf Ag                          |
| L18887           | Calnexin                                                     | NC  | -2.9 | Protein secretion                                          |
| AI621079         | Coatmer protein complex, subunit alpha                       | NC  | -2.9 | ER to Golgi transport                                      |
| AW242916         | DKFZp564F053                                                 | NC  | -2.9 |                                                            |
| AL050050         | DKFZp566D133 hypothetical protein                            | NC  | -2.9 |                                                            |
| X62009           | Fibrillin 2 (FBN2)                                           | NC  | -2.9 |                                                            |
| AK025862         | FLJ22209 fis, clone HRC01496                                 | NC  | -2.9 |                                                            |
| U16307           | Glioma pathogenesis-related protein (GliPR)                  | NC  | -2.9 | Pathogenesis                                               |
| U29538           | Human heart protein with four and a half LIM domains (FHL-1) | NC  | -2.9 | Cell growth; muscle development; cell differentiation      |
| NM_024840        | Hypothetical protein FLJ13590                                | NC  | -2.9 |                                                            |
| L12002           | Integrin alpha 4 subunit                                     | NC  | -2.9 | Cell-matrix adhesion; integrin-mediated signalling pathway |
| AK023621         | KIAA0878 protein                                             | NC  | -2.9 |                                                            |
| Z24725           | Mitogen inducible 2                                          | NC  | -2.9 |                                                            |
| AF274954         | PNAS-29                                                      | NC  | -2.9 |                                                            |
| BC003364         | ADP-ribosylation factor 4                                    | NC  | -3   | Intracellular protein transport                            |
| BC002416         | Biglycan (BGN)                                               | NC  | -3.1 | Extracellular matrix structural constituent                |
| AB043587         | Golgi resident protein GCP60                                 | NC  | -3.1 | Sorting and modification of proteins from ER               |
| AF010193         | MAD (mothers against decapentaplegic) homologue 7 (MADH7)    | NC  | -3.2 | Regulation of transcription, DNA-dependent                 |
| AF196834         | Twisted gastrulation (TSG)                                   | NC  | -3.2 | Dorsal-ventral axis inducing activity                      |
| AF294326         | Core-binding factor beta isoform PEBP2B                      | NC  | -3.3 | Transcription from Pol II promoter                         |
| AF220051         | Haematopoietic stem/progenitor cells protein MDS031          | NC  | -3.3 |                                                            |
| AF119855         | PR01847                                                      | NC  | -3.3 |                                                            |
| AF000992         | Ubiquitous tetratricopeptide repeat gene, X isoform (UTX)    | NC  | -3.3 |                                                            |
| AF151834         | CGI-76 protein (LOC51632)                                    | NC  | -3.4 |                                                            |
| NM_018240        | Hypothetical protein FLJ10845                                | NC  | -3.4 |                                                            |
| NM_018351        | Hypothetical protein FLJ11183                                | NC  | -3.4 |                                                            |
| AF107493         | LUCA-15 protein mRNA, splice variant                         | NC  | -3.4 | RNA processing; negative regulation of cell cycle          |
| NM_005936        | Mixed-lineage leukaemia translocated to 4 (MLLT4)            | NC  | -3.4 |                                                            |
| AF042273         | STAM-like protein-containing SH3 and ITAM domains 2          | NC  | -3.4 | Intracellular protein transport                            |
| BC001731         | Membrane component, chromosome 11, surface marker 1          | NC  | -3.5 |                                                            |
| AF022860         | Neuropilin 2                                                 | NC  | -3.5 | Sorting neuronal cells into distinct brain structures      |
| NM_003825        | Synaptosomal-associated protein (SNAP23)                     | NC  | -3.5 | Membrane fusion in intracellular vesicle traffic           |
| AF241230         | TAK1-binding protein 2                                       | NC  | -3.5 | Induce JNK and Nfκ-B                                       |
| BC005807         | clone MGC:10264                                              | NC  | -3.6 |                                                            |
| D87119           | GS3955 protein, clone MGC:3860                               | NC  | -3.6 | Protein amino acid phosphorylation                         |
| NM_030921        | Hypothetical protein DC42                                    | NC  | -3.6 |                                                            |
| AF069765         | Signal recognition particle 72kD                             | NC  | -3.6 | Protein targeting                                          |
| AF008937         | Syntaxin-16C                                                 | NC  | -3.6 |                                                            |
| NM_030799        | Hypothetical protein AF140225                                | NC  | -3.7 |                                                            |
| NM_022090        | Transposon-derived Buster3 transposase-like                  | NC  | -3.7 |                                                            |
| AK021457.1       | cDNA FLJ11395 fis, clone HEMBA1000594                        | NC  | -3.8 |                                                            |
| AF000985         | Dead box, Y isoform (DBY)                                    | NC  | -3.8 | ATP-dependent helicase activity                            |

Table S1 Continued.

| Accession number | Gene title                                                     | 3 h | 21 h  | Function                                                    |
|------------------|----------------------------------------------------------------|-----|-------|-------------------------------------------------------------|
| AL162040         | DKFZp434N199                                                   | NC  | -3.8  |                                                             |
| BC000687         | Translocating chain-associating membrane protein (TRAM)        | NC  | -3.8  | Protein targeting; co-translational membrane targeting      |
| M77227           | Competitive HGF antagonist                                     | NC  | -3.9  |                                                             |
| AL137673         | DKFZp434H0872                                                  | NC  | -3.9  |                                                             |
| AI743740         | DKFZp586F1323                                                  | NC  | -3.9  |                                                             |
| NM_024524        | Hypothetical protein FLJ20986                                  | NC  | -3.9  |                                                             |
| NM_030755        | Thioredoxin-related transmembrane protein (TMX)                | NC  | -3.9  | Electron transport                                          |
| AF230399         | Tripartite motif protein TRIM23 gamma                          | NC  | -4    | Small GTPase-mediated signal transduction                   |
| AC002544         | Chromosome 16 BAC clone CIT987SK-A-761H5                       | NC  | -4.1  |                                                             |
| NM_004866        | Secretory carrier membrane protein 1 (SCAMP1)                  | NC  | -4.1  |                                                             |
| NM_001884        | Cartilage linking protein 1 (CRTL1)                            | NC  | -4.2  | Cell adhesion                                               |
| D13630           | KIAA0005 gene product                                          | NC  | -4.2  |                                                             |
| AF111113         | SBBI26 protein (SBBI26)                                        | NC  | -4.2  | Protein-binding activity                                    |
| NM_031214        | Hypothetical protein AF311304                                  | NC  | -4.3  |                                                             |
| NM_022828        | Hypothetical protein FLJ21940                                  | NC  | -4.3  |                                                             |
| AF230398         | Tripartite motif protein TRIM23 beta                           | NC  | -4.4  |                                                             |
| NM_006815        | Coated vesicle membrane protein (RNP24)                        | NC  | -4.5  | Intracellular protein transport                             |
| AK023111         | Highly similar to NUCLEOPROTEIN TPR                            | NC  | -4.5  |                                                             |
| NM_006667        | Progesterone-binding protein                                   | NC  | -4.5  |                                                             |
| D86326           | Vesicle docking protein p115                                   | NC  | -4.5  | Intracellular protein transport                             |
| NM_006815        | Coated vesicle membrane protein (RNP24)                        | NC  | -4.7  | Intracellular protein transport                             |
| NM_003139        | Signal recognition particle receptor (docking protein)         | NC  | -4.7  | Protein targeting                                           |
| BC006141         | Erythrocyte protein band 4.1-like 3                            | NC  | -4.8  | Actin binding                                               |
| U45976           | Clathrin assembly lymphoid-myeloid leukaemia gene (CLTH)       | NC  | -4.9  | Vesicle-mediated transport                                  |
| NM_001430        | Endothelial PAS domain protein 1 (EPAS1)                       | NC  | -4.9  | Regulation of transcription, DNA-dependent                  |
| AL137000         | KIAA0970 protein                                               | NC  | -5.2  |                                                             |
| AF257501         | SYTSSX4v fusion protein (SSXTSSX4v fusion)                     | NC  | -5.3  | Cell growth and/or maintenance                              |
| AF047448         | TLS-associated protein TASR                                    | NC  | -5.6  | Spliceosome assembly; mRNA processing                       |
| AK026803         | FLJ23150 fis, clone LNG09358                                   | NC  | -6    |                                                             |
| AB017445         | X-ray repair complementing defective repair (XRCC4)            | NC  | -6.1  | DNA recombination; double-strand break repair               |
| AF163441         | Golgin 67                                                      | NC  | -6.2  |                                                             |
| AF308601         | NOTCH 2 (N2)                                                   | NC  | -6.2  |                                                             |
| AF223468         | AD021 protein (LOC51313)                                       | NC  | -6.3  |                                                             |
| BE465032         | Hypothetical protein FLJ12619                                  | NC  | -6.6  |                                                             |
| AF100745         | PTD016 protein (LOC51136)                                      | NC  | -6.7  |                                                             |
| NM_002518        | Neuronal PAS domain protein 2 (NPAS2)                          | NC  | -7    | Central nervous system development                          |
| NM_006364        | Sec23 ( <i>S. cerevisiae</i> ) homologue A (SEC23A)            | NC  | -7    | Intracellular protein transport; vesicle-mediated transport |
| NM_006544        | SEC10 ( <i>S. cerevisiae</i> )-like 1 (SEC10L1)                | NC  | -7.4  | Intracellular protein transport                             |
| D84294           | Tetratricopeptide repeat domain 3                              | NC  | -7.5  | Pathogenesis                                                |
| NM_018243        | Hypothetical protein FLJ10849                                  | NC  | -7.9  |                                                             |
| AF130055         | Translocating chain-associating membrane protein               | NC  | -8.7  | Protein targeting; co-translational membrane targeting      |
| AK021846         | Sec23-interacting protein p125                                 | NC  | -13.6 | Golgi organization and biogenesis                           |
| L19161           | Eukaryotic translation initiation factor 2, subunit 3 (EIF2S3) | NC  | -13.9 | Translational elongation                                    |
| NM_005570        | Lectin, mannose-binding, 1 (LMAN1)                             | NC  | -15.4 | Transport of mannose glycans from ER to Golgi               |
| BG257762         | Hypothetical protein                                           | NC  | -15.6 |                                                             |
